# Supplementary material for: An RNA-aptamer-based two-color CRISPR labeling system
Source: PubMed Central journal article supplement (PMC4882555; doi:10.1038/srep26857), 2016-05-27
Supplement: srep26857-s1.pdf [file srep26857-s1.pdf]

**Supplementary Materials for**  
**An RNA-aptamer-based two-color CRISPR labeling system**

Siyuan Wang, Jun-Han Su, Feng Zhang, Xiaowei Zhuang

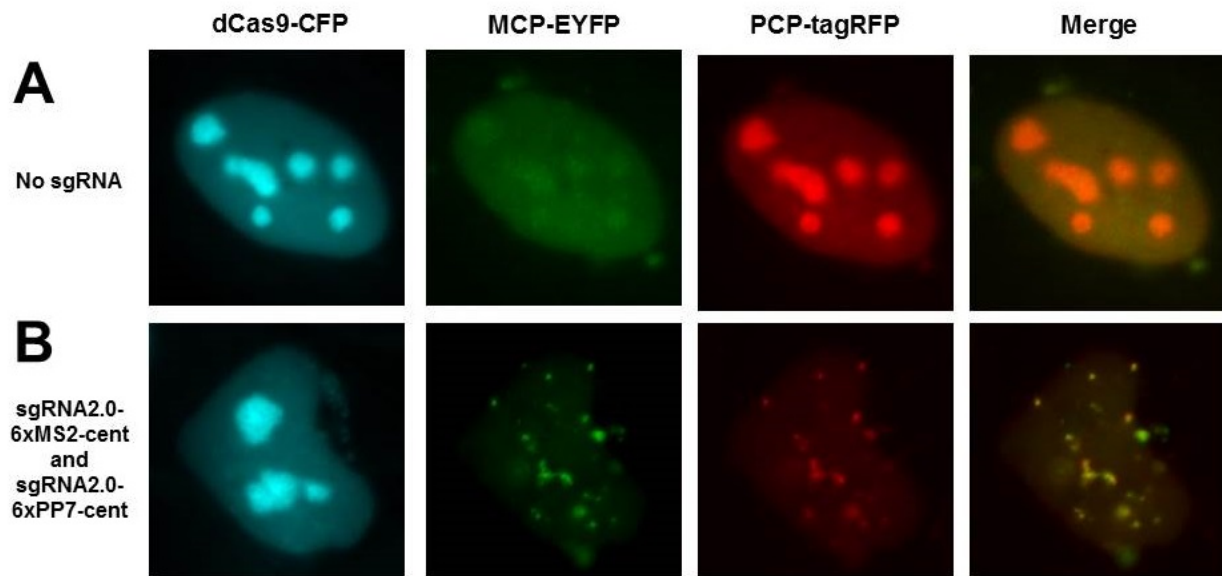

**Figure S1.** Three-color imaging of the dCas9-ECFP, MCP-EYFP, and PCP-tagRFP. (A) Untransfected cells. (B) Cells co-transfected with sgRNA2.0-6xMS2 and sgRNA2.0-6xPP7 targeting centromeres. First column: CFP fluorescence channel. Second column: EYFP fluorescence channel. Third column: tagRFP fluorescence channel. Fourth column: composite images of the EYFP and tagRFP channels.

## Sequence of pLVX-dCas9-ECFP in GenBank format

LOCUS pLVX\_dCas9\_ECFP 12765 bp ds-DNA circular 30-DEC-2015  
DEFINITION Lentiviral vector for doxycycline-inducible expression of a gene in cells containing the Tet-On 3G transactivator protein.  
ACCESSION .  
VERSION .  
KEYWORDS pLVX-TRE3G  
SOURCE synthetic DNA construct  
ORGANISM synthetic DNA construct  
REFERENCE 1 (bases 1 to 7819)  
AUTHORS Clontech  
TITLE Direct Submission  
JOURNAL Exported Friday, Jun 27, 2014 from SnapGene Viewer 2.4.2  
<http://www.snapgene.com>  
COMMENT  
COMMENT ApEinfo:methylated:1  
FEATURES Location/Qualifiers  
LTR 1..634  
/note="5' LTR"  
/note="5' long terminal repeat (LTR) from HIV-1"  
/label=5' LTR  
/ApEinfo\_fwdcolor=pink  
/ApEinfo\_revcolor=pink  
/ApEinfo\_graphicformat=arrow\_data {{0 1 2 0 0 -1}} {} 0  
width 5 offset 0  
misc\_feature 681..806  
/note="HIV-1 psi"  
/note="packaging signal of human immunodeficiency virus type 1"  
/label=HIV-1 psi  
/ApEinfo\_fwdcolor=pink  
/ApEinfo\_revcolor=pink  
/ApEinfo\_graphicformat=arrow\_data {{0 1 2 0 0 -1}} {} 0  
width 5 offset 0  
misc\_feature 1303..1536  
/note="RRE"  
/note="The Rev response element (RRE) of HIV-1 allows for Rev-dependent mRNA export from the nucleus to the cytoplasm."  
/label=RRE  
/ApEinfo\_fwdcolor=pink  
/ApEinfo\_revcolor=pink  
/ApEinfo\_graphicformat=arrow\_data {{0 1 2 0 0 -1}} {} 0  
width 5 offset 0  
misc\_feature 2028..2144  
/note="cPPT/CTS"  
/note="central polypurine tract and central termination sequence of HIV-1 (lacking the first T)"  
/label=cPPT/CTS  
/ApEinfo\_fwdcolor=pink  
/ApEinfo\_revcolor=pink  
/ApEinfo\_graphicformat=arrow\_data {{0 1 2 0 0 -1}} {} 0  
width 5 offset 0  
misc\_feature 2908..7008  
/label=SpCas9 (D10A, H840A)  
/ApEinfo\_fwdcolor=cyan  
/ApEinfo\_revcolor=green  
/ApEinfo\_graphicformat=arrow\_data {{0 1 2 0 0 -1}} {} 0  
width 5 offset 0  
promoter 7775..8274  
/note="PGK promoter"  
/note="mouse phosphoglycerate kinase 1 promoter"  
/label=PGK promoter  
/ApEinfo\_fwdcolor=pink  
/ApEinfo\_revcolor=pink  
/ApEinfo\_graphicformat=arrow\_data {{0 1 2 0 0 -1}} {} 0  
width 5 offset 0  
misc\_feature 8687..9275

```

        /note="WPRE"
        /note="woodchuck hepatitis virus posttranscriptional
        regulatory element"
        /label=WPRE
        /ApEinfo_fwdcolor=pink
        /ApEinfo_revcolor=pink
        /ApEinfo_graphicformat=arrow_data {{0 1 2 0 0 -1}} {} 0
        width 5 offset 0
LTR      9483..10116
        /note="3' LTR"
        /note="3' long terminal repeat (LTR) from HIV-1"
        /label=3' LTR
        /ApEinfo_fwdcolor=pink
        /ApEinfo_revcolor=pink
        /ApEinfo_graphicformat=arrow_data {{0 1 2 0 0 -1}} {} 0
        width 5 offset 0
rep_origin  complement(10647..11232)
        /direction=LEFT
        /note="ori"
        /note="high-copy-number ColE1/pMB1/pBR322/pUC origin of
        replication"
        /label=ori
        /ApEinfo_fwdcolor=pink
        /ApEinfo_revcolor=pink
        /ApEinfo_graphicformat=arrow_data {{0 1 2 0 0 -1}} {} 0
        width 5 offset 0
CDS      complement(11403..12263)
        /codon_start=1
        /gene="bla"
        /product="beta-lactamase"
        /note="AmpR"
        /note="confers resistance to ampicillin, carbenicillin,
        and related antibiotics"
        /translation="MSIQHFRVALIPFFAAFCLPVFAHPETLVKVKDAEDQLGARVGY
        I
        ELDLNSGKILESFRPEERFPMSTMFKVLLCGAVLSRIDAGQEQLGRRRIHYSQNDLVEY
        S
        PVTEKHLTDGMTVRELCSSAAITMSDNNTAANLLLTIGGPKELTAFLHNMGDHSVTRLDR
        W
        EPELNEAIPNDERDTTMPVAMATTLRKLTLGELLTLASRQQLIDWMEADKVAGPLLRSA
        A
        LPAGWFIADKSGAGERGSRGIIAALGPDGKPSRIVVIYTTGSQATMDERNRQIAEIGA
        S LIKHW"
        /label=beta-lactamase
        /ApEinfo_fwdcolor=pink
        /ApEinfo_revcolor=pink
        /ApEinfo_graphicformat=arrow_data {{0 1 2 0 0 -1}} {} 0
        width 5 offset 0
polyA_signal  12416..12550
        /note="SV40 poly(A) signal"
        /note="SV40 polyadenylation signal"
        /label=SV40 poly(A) signal
        /ApEinfo_fwdcolor=pink
        /ApEinfo_revcolor=pink
        /ApEinfo_graphicformat=arrow_data {{0 1 2 0 0 -1}} {} 0
        width 5 offset 0
promoter   2719..2788
        /label=CMV_promoter
        /ApEinfo_fwdcolor=#ccff66
        /ApEinfo_revcolor=pink
        /ApEinfo_graphicformat=arrow_data {{0 1 2 0 0 -1}} {} 0
        width 5 offset 0
misc_feature  7018..7038
        /label=NLS
        /ApEinfo_fwdcolor=#ff8080
        /ApEinfo_revcolor=green
        /ApEinfo_graphicformat=arrow_data {{0 1 2 0 0 -1}} {} 0
        width 5 offset 0
misc_feature  2264..2551
        /label=CAG_enhancer

```

```

/ApEinfo_fwdcolor=pink
/ApEinfo_revcolor=pink
/ApEinfo_graphicformat=arrow_data {{0 1 2 0 0 -1}} {} 0
width 5 offset 0
misc_feature 2887..2907
/label=NLS(1)
/ApEinfo_label=NLS
/ApEinfo_fwdcolor=#ff8080
/ApEinfo_revcolor=green
/ApEinfo_graphicformat=arrow_data {{0 1 2 0 0 -1}} {} 0
width 5 offset 0
promoter 2209..2761
/label=CMV_immediately_promoter
/ApEinfo_fwdcolor=#ccff66
/ApEinfo_revcolor=pink
/ApEinfo_graphicformat=arrow_data {{0 1 2 0 0 -1}} {} 0
width 5 offset 0
misc_feature 8295..8669
/label=ZeoR
/ApEinfo_fwdcolor=cyan
/ApEinfo_revcolor=green
/ApEinfo_graphicformat=arrow_data {{0 1 2 0 0 -1}} {} 0
width 5 offset 0
CDS 7048..7761
/gene="ECFP"
/note="ORF frame 1"
/translation="MVSKGEELFTGVVPILVELDGDVNGHKFSVSGEGEDATYGKLT
LKFICTTGKLPVWPVTLVTTLTWGVQCFSRYPDHMKQHDFFKSAMPEGYVQERTIFFK
DDGNYKTRAEVKFEGDTLVNRIELKGIDFKEDGNILGHKLENYISHNVYITADKQKN
GIKANFKIRHNIEDGSVQLADHYQQNTPIGDGPVLLPDNHYLSTQSALS KDPNEKRDH
MVLLEFVTAAGITLGMDELKSGLSRAQASNSAVDGTAGPGSTGSR*"
/label=ECFP
/ApEinfo_fwdcolor=#00ffff
/ApEinfo_revcolor=pink
/ApEinfo_graphicformat=arrow_data {{0 1 2 0 0 -1}} {} 0
width 5 offset 0

```

ORIGIN

```

1  tggaggct aattcactcc caaagaagac aagatattct tgaatctgg atctaccaca
61  cacaaggcta cttccctgat tagcagaact acacaccagg gccaggggctc agatattcac
121 tgaccttgg atggtgctac aagctagtac cagttgagcc agataaggta gaagaggcca
181 ataaaggaga gaacaccagc ttgttacacc ctgtgagcct gcatgggatg gatgaccggg
241 agagagaagt gttagatgg aggtttgaca gccgcctagc attcatcac gtggcccgag
301 agctgcatcc ggagtacttc aagaactgct gatatcgagc ttgtacaag ggactttccg
361 ctggggactt tccagggagg cgtggcctgg gcgggactgg ggagtggcga gccctcagat
421 cctgcatata agcagctgct tttgctctg actgggtctc tctggttaga ccagatctga
481 gcctgggagc tctctgcta actagggaac cactgctta agcctcaata aagcttgcct
541 tgagtcttcc aagtagtgg tgcccgtctg ttgtgtgact ctgtaacta gagatccctc
601 agaccctttt agtcagtgtg gaaaatctct agcagtgagg cccgaacagg gacttgaag
661 cgaaggaggaa accagaggag ctctctgac gcaggactcg gctgtgtaga gcgcgcacgg
721 caagaggcga gggcgccgca ctggtgagta cgcaaaaat ttgactagc ggaggctaga
781 aggagagaga tgggtgcgag agcgtcagta taaagcggg gagaattaga tgcgatggg
841 aaaaattcg gttaggcca gggggaaga aaaaataata attaaacat atagtatggg
901 caagcaggga gctagaacga ttcgagtta atcctggcct gttagaaca tcagaaggct
961 gtgacaaaat actgggacag ctacaacct ccttcagac aggatcagaa gaacttagat
1021 cattataaa tacagtagca accctctatt gtgtgcatca aaggatagag ataaaagaca
1081 ccaagggaag tttagacaag atagaggaag agcaaaaaca aagtaagacc accgcacagc
1141 aagcggccgg ccgctgatct tcagacctgg aggaggagat atgagggaca attgagagaag
1201 tgaattatat aaataaaag tagtaaaaat tgaaccatta ggagtgcac ccaccaaggc
1261 aaagagaaga gtggtgcaga gagaaaaaag agcagtgga ataggagctt gttccttgg
1321 gttcttggga gcagcaggaa gcactatggg cgcagcgtca atgacgctga cgttacaggc
1381 cagacaatta ttgtctgta tagtgacga gcagaacaat ttgctgagg ctattgaggc
1441 gcaacagcat ctgttcaac tcacagtctg gggcatcaag cagctccagg caagaatcct
1501 ggctgtggaa agatacctaa aggatcaaca gctcctggg atttggggtt gctctggaaa
1561 actcaattgc accactgctg tgccctggaa tgctagtgg agtaataaat ctctggaa
1621 gatttgaat cacacgacct ggatggagt ggacagagaa ataaacaatt acacaagctt
1681 aatacactcc ttaattgaag aatcgcaaaa ccagcaagaa aagaatgaac aagaattatt
1741 ggaattagat aaatgggcaa gtttggaa ttgtttaa ataaacaatt ggctgtgta
1801 tataaataa tcataatga tagtaggagg ctggtaggt ttaagaatag ttttctgt
1861 acttctata gtgaatagag ttaggcagg atattacca ttatcttc agaccacct
1921 cccaacccc aggggaccgc acaggcccga aggaatagaa gaagaaggtg gagagagaga

```

1981 cagagacaga tccattcgat tagtgaacgg atctcgacgg tctcgccttt aaaagaaaag  
2041 gggggattgg ggggtacagt gcaggggaaa gaatagtaga cataatagca acagacatac  
2101 aaactaaaga actacaaaa caaattaca aaattcaaaa ttttcgggtt tattacagg  
2161 acagcagaga tccagttat cgatgaggcc ctttcgtct cactcgagAT AGTAATCAAT  
2221 TACGGGGTCA TTAGTTCATA GCCCATATAT GGAGTTCGCG GTTACATAAC TTACGGTAAA  
2281 TGGCCCCGCT GGCTGACCGC CCAACGACCC CCGCCATTG ACGTCAATAA TGACGTATGT  
2341 TCCCATAGTA ACGCCAATAG GGACTTTCCA TTGACGTCAA TGGGTGGAGT ATTTACGGTA  
2401 AACTGCCCCA AAAAGAAGAG GAAAGTGTA TCATATGCCA AGTACGCCCC CTATTGACGT  
2461 CAATGACGGT AAATGGCCCG CCTGGCATTG TGCCAGTAC ATGACCTTAT GGGACTTTCC  
2521 TACTTGGCAG TACATCTACG TATTAGTCAT CGCTATTACC ATGGTGATGC GGTTTTGGCA  
2581 GTACATCAAT GGGCGTGGAT AGCGGTTTGA CTCACGGGGA TTTCCAAGTC TCCACCCAT  
2641 TGACGTCAAT GGGAGTTTGT TTTGGCACCA AAATCAACGG GACTTTCCAA AATGTCGTAA  
2701 CAACTCCGCC CCATTGACGC AAATGGGCGG TAGGCGTGTA CGGTGGGAGG TCTATATAAG  
2761 CAGAGCTGGT TTAGTGAAAC GTCAGATCCG CTAGCGTAC CGGACTCAGA TCTCGAGCTC  
2821 AAGCTTCGAA TTCTGCAGTC GACGGTACCG CGGGCCCGGG ATCCACCGGT CGCCACCATG  
2881 GCTAGCCCCA AAAAGAAGAG GAAAGTGAC AAGAAGTACA GCATCGGCCT GGCCATCGGC  
2941 ACCAACTCTG TGGGCTGGGC CGTGATCACC GACGAGTACA AGGTGCCAG CAAGAAATTC  
3001 AAGGTGCTGG GCAACACCGA CCGGCACAGC ATCAAGAAGA ACCTGATCGG AGCCCTGCTG  
3061 TTCGACAGCG GCGAAACAGC CGAGGCCACC CGGCTGAAGA GAACCGCCAG AAGAAGATAC  
3121 ACCGACCGGA AGAACCGGAT CTGCTATCTG CAAGAGATCT TCAGCAACGA GATGGCCAA  
3181 GTGGACGACA GCTTCTTCCA CAGACTGGAA GATCCTTCC TGGTGGAAAG GGATAAGAAG  
3241 CACGAGCGGC ACCCATCTT CGGCAACATC GTGGACGAGG TGGCCTACCA CGAGAAGTAC  
3301 CCCACCATCT ACCACTGAG AAAGAAACTG GTGGACAGCA CCGACAAGGC CGACCTGCGG  
3361 CTGATCTATC TGGCCCTGGC CCACATGATC AAGTTCGGG GCCACTTCTT GATCGAGGGC  
3421 GACCTGCAAC CCGCAACAG CGACTGGAC AAGCTGTTCA TCCAGCTGGT CGAGACCTAC  
3481 AACCAGCTGT TCGAGGAAAA CCCATCAAC GCCAGCGGCG TGGACGCCAA GGCCATCCTG  
3541 TCTGCCAGAC TGAGCAAGAG CAGACGGCTG GAAAATCTGA TCGCCAGCT GCCCGGCGAG  
3601 AAGAAGAATG GCCTGTTCCG CAACCTGATT GCCCTGAGCC TGGGCTGAC CCCCACCTTC  
3661 AAGAGCAAC CCGACTGGC CGAGGATGCC AAAGTGCAG TGAGCAAGGA CACTACGAC  
3721 GACGACCTGG ACAACCTGCT GGCCAGATC GGCGACCAGT ACGCCGACCT GTTTCTGGCC  
3781 GCCAAGAACC TGTCCGACGC CATCTGCTG AGCGACATCC TGAGAGTGAA CACCGAGATC  
3841 ACCAAGGCC CCCTGAGCGC CTCTATGATC AAGAGATACG ACGAGCACCA CCAGGACCTG  
3901 ACCCTGCTGA AGTACTCTGT GCGGCAGCAG CTGCTGAGA AGTACAAAGA GATTTTCTTC  
3961 GACCAGAGCA AGAACGGCTA CGCCGGCTAC ATTGACGGCG GAGCCAGCCA GGAAGAGTTC  
4021 TACAAGTTCA TCAAGCCAT CCTGGAAAAG ATGGACGGCA CCGAGGAACT GCTCGTGAAG  
4081 CTGAACAGAG AGGACTGCT GCGGAAGCAG CGGACCTTCG ACAACGGCAG CATCCCCAC  
4141 CAGATCCACC TGGGAGAGCT GCACGCCATT CTGCGGCGGC AGGAAGATTT TTACCCATT  
4201 CTGAAGGACA ACCGGGAAAA GATCGAGAAG ATCTGACCT TCCGCATCCC TCACTACGTG  
4261 GGCCCTCTGG CCAGGGGAAA CAGCAGATTC GCCTGGATGA CCAGAAAAGAG CGAGGAAAAC  
4321 ATCACCCCTT GGAATTCGA GGAAGTGGTG GACAAGGGCG CTTCGCCCCA GAGCTTCATC  
4381 GAGCGGATGA CCAACTTCGA TAAGAACCTG CCCAACGAGA AGGTGCTGCC CAAGCACAGC  
4441 CTGCTGTACG AGTACTTCA CCGTGTATAAC GAGCTGACCA AAGTGAATAA CGTGACCGAG  
4501 GGAATGAGAA AGCCCGCTT CCTGAGCGGC GAGCAGAAA AGGCCATCGT GGACCTGCTG  
4561 TTCAAGACCA ACCGAAAGT GACCGTGAAG CAGCTGAAAG AGGACTACTT CAAGAAAATC  
4621 GAGTGCTTCG ACTCCGTGGA AATCTCCGGC GTGGAAGATC GGTTCACCGC CTCCTGGGC  
4681 ACATACCACG TCTGTGTA AATTATCAAG GACAAGGACT TCTGGACAA TGAGGAAAAC  
4741 GAGGACATTC TGGAAGATAT CGTGTGACC CTGACACTGT TTGAGGACAG AGAGATGATC  
4801 GAGGAACGGC TGA AACCTA TGCCACCTG TTCGACGACA AAGTATGAA GCAGCTGAAG  
4861 CGGCGGAGAT ACACCGGCTG GGGCAGGCTG AGCCGGAAGC TGATCAACGG CATCCGGGAC  
4921 AAGCAGTCCG GCAAGACAAT CCTGGATTTT CTGAAGTCCG ACGGCTTCGC CAACAGAAA  
4981 TTCATCAGC TGATCCACA CGACAGCCTG ACCTTTAAAG AGGACATCCA GAAAGCCAG  
5041 GTGTCCGGCC AGGGCGATAG CCTGCACGAG CACATTGCCA ATCTGGCCGG CAGCCCCGCC  
5101 ATTAAGAAGG GCATCTGCA GACAGTGAAG GTGGTGGACG AGCTCGTGA AGTGATGGGC  
5161 CGGCACAAGC CCGAGAACAT CGTGATCGAA ATGGCCAGAG AGAACCCAG CACCCAGAAG  
5221 GGACAGAAGA ACAGCCGCGA GAGAATGAAG CGGATCGAAG AGGGCATCAA AGAGCTGGGG  
5281 AGCCAGATCC TGAAGAACA CCCCGTGAA AACACCCAGC TGCAGAACGA GAAGCTGTAC  
5341 CTGTACTACC TGCAGAAATGG GCGGGATATG TACGTGGACC AGGAACTGGA CATCAACCGG  
5401 CTGTCCGACT ACGATGTGGA CGCTATCGTG CCTCAGAGCT TTCTGAAGGA CGACTCCATC  
5461 GACAACAAGG TGCTGACCAG AAGCGACAAG AACCGGGCA AGAGCGACAA CGTGCCCTCC  
5521 GAAGAGGTCG TGAAGAAGAT GAAGAACTAC TGGCGGCAGC TGCTGAACGC CAAGCTGATT  
5581 ACCCAGAGAA AGTTCGACAA TCTGACCAA GCGGAGAGAG GCGGCCTGAG CGAACTGGAT  
5641 AAGGCCGGCT TCATCAAGAG ACAGCTGGTG GAAACCCGGC AGATCACAAA GCACGTGGCA  
5701 CAGATCTGCT ACTCCGGAT GAACACTAAG TACGACGAGA ATGACAAGCT GATCCGGGAA  
5761 GTGAAAAGTGA TACCCTGAA GTCCAAGCTG GTGTCCGATT TCCGGAAGGA TTCCAGTTT  
5821 TACAAAGTGC GCGAGATCAA CAACTACCAC CACGCCACG ACGCCTACCT GAACGCCGTC  
5881 GTGGGAACCG CCCTGATCAA AAAGTACCCT AAGCTGGAAA GCGAGTTCGT GTACGGCGAC  
5941 TACAAGGCTG ACGAGTGGC GAAGATGATC GCCAAGAGCG AGCAGGAAAT CGGCAAGGCT  
6001 ACCGCCAAGT ACTTCTTCTA CAGCAACATC ATGAACTTTT TCAAGACCGA GATTACCCTG  
6061 GCCAACGGCG AGATCCGGAA GCGGCCCTCTG ATCGAGACAA ACGGCGAAAC CGGGGAGATC  
6121 GTGTGGGATA AGGGCCGGGA TTTTGCCACC GTGCGGAAAAG TGCTGAGCAT GCCCAAAGT

6181 AATATCGTGA AAAAGACCGA GGTGCAGACA GCGGCTTCA GCAAAGAGTC TATCCTGCC  
6241 AAGAGGAACA GCGATAAGCT GATCGCCAGA AAGAAGGACT GGGACCCTAA GAAGTACGGC  
6301 GGCTFCGACA GCCCACCGT GGCCTATTCT GTGCTGGTGG TGGCCAAAGT GGAAAAGGGC  
6361 AAGTCCAAGA AACTGAAGAG TGTGAAAGAG CTGCTGGGGA TCACCATCAT GGAAAAGAGC  
6421 AGCTTCGAGA AGAATCCCAT CGACTTTCTG GAAGCCAAGG GCTACAAAGA AGTGA AAAAG  
6481 GACCTGATCA TCAAGCTGCC TAAGTACTCC CTGTTTCGAGC TGGAAAACCG CCGGAAGAGA  
6541 ATGCTGGCCT CTGCCGGCGA ACTGCAGAAG GGAAACGAAC TGGCCCTGCC CTCCAAATAT  
6601 GTGAACCTCC TGTACCTGGC CAGCCACTAT GAGAAGCTGA AGGGCTCCCC CGAGGATAAT  
6661 GAGCAGAAAC AGCTGTTTGT GGAACAGCAC AAGCACTACC TGGACGAGAT CATCGAGCAG  
6721 ATCAGCGAGT TCTCAAGAG AGTGATCCTG GCCGACGCTA ATCTGGACAA AGTGCTGTCC  
6781 GCCTACAACA AGCACCAGGTA TAAGCCCATC AGAGAGCAGG CCGAGAATAT CATCCACCTG  
6841 TTTACCCTGA CCAATCTGGG AGCCCCTGCC GCCTTCAAGT ACTTTGACAC CACCATCGAC  
6901 CGGAAGAGGT ACACCAGCAC CAAAGAGGTG CTGGACGCCA CCCTGATCCA CCAGAGCATC  
6961 ACCGGCCTGT ACGAGACACG GATCGACCTG TCTCAGCTGG GAGGCGACGA GGGAGCTCCC  
7021 AAGAAAAAGC GCAAGGTAGG TAGTTCCTGT AGCAAGGGCG AGGAGCTGTT CACCGGGGTG  
7081 GTGCCATCC TGGTCGAGCT GGACGGCGAC GTAAACGGCC ACAAGTTCAG CGTGTCCGGC  
7141 GAGGGCGAGG GCGATGCCAC CTACGGCAAG CTGACCCTGA AGTTCATCTG CACCACCGGC  
7201 AAGCTGCCCG TGCCCTGGCC CACCCTCGTG ACCACCCTGA CCTGGGGCGT GCAGTGCTTC  
7261 AGCCGCTACC CCGACCACAT GAAGCAGCAC GACTTCTTCA AGTCCGCCAT GCCGGAAGGC  
7321 TACGTCCAGG AGCGCACCAT CTCTTCAAG GACGACGCA ACTACAAGAC CCGCGCCGAG  
7381 GTGAAGTTTCG AGGGCGACAC CTTGGTGAAC CGCATCGAGC TGAAGGGCAT CGACTTCAAG  
7441 GAGGACGGCA ACATCCTGGG GCACAAGCTG GAGTACAAC ACATCAGCCA CAACGTCTAT  
7501 ATCACCGCCG ACAAGCAGAA GAACGGCATC AAGGCCAACT TCAAGATCCG CCACAACATC  
7561 GAGGACGGCA GCGTGCAGCT CGCCGACCAC TACCAGCAGA ACACCCCAT CGGCGACGGC  
7621 CCGGTGCTGC TGGCCGACAA CCACTACCTG AGCACCCAGT CCGCCCTGAG CAAAGACCCC  
7681 AACGAGAAGC GCGATCACAT GGTCTGCTG GAGTTCGTGA CCGCCGCCGG GATCACTCTC  
7741 GGATGGACG AGCTGTACAA Gtaagaattc taccggtag gggaggcgt ttccaagg  
7801 cagtctggag catgccttt agcagcccc ctggcactt ggcgtacac aagtggcctc  
7861 tgcctcga cacattcac atccaccgtt agcgccaac cggctcgtt cttgtgtgc  
7921 cccctcgcg cacccttac tctctccta gtcaggaagt tccccccgc cccgagctc  
7981 gcgtctgca ggactgaca aatggaagta gcactctca ctagtctgt gcagatggac  
8041 agcaccctg agcaatgaa gcggtaggc cttggggca gggccaata gcagctttgc  
8101 tcttctgct tctggctca gagctggga aggggtgggt cggggggcgg gctcaggggc  
8161 gggctcagg gggggcgagg gcccgaagg tctcggag gcccgcatt ctgcaagctt  
8221 caaaagcga cgtctccgc gctgtctcc tcttctcat ctccggcct ttcagctgc  
8281 agcccaagct taccATGGCC AAGTTGACCA GTGCCGTTCC GGTGCTCACC GCGCGGACG  
8341 TCGCCGGAGC GGTGAGTTC TGGACCGACC GGCTCGGTT CTCCCGGAG TTCGTGGAGG  
8401 ACGACTTCGC CGGTGTGGTC CGGGACGACG TGACCCTGTT CATCAGCGCG GTCCAGGACC  
8461 AGGTGGTGCC GGACAACACC CTGGCCTGGG TGTGGGTGCG CGGCCTGGAC GAGCTGTACC  
8521 CCGAGTGGTC GGAGTCTGT TCCACGAAC TCCGGGACGC CTCCGGGCC GCCATGACCG  
8581 AGATCGGCA GCAGCCGTGG GGGCGGGAGT TCGCCCTGCG CGACCCGCC GCAACTGCG  
8641 TGCACTTCGT GGCCGAGGAG CAGGACTGAc gggcgcgctc tgaacaatc aaccttggg  
8701 ttacaaaatt tgtgaaagat tgaactgtat tttaactat gttgctcct ttacgctatg  
8761 tggatacgt gctttaatgc ctttctatc tctattgct tcccgtatgg ctttctatt  
8821 ctctctctg tataaatct ggttctgtc tctttatgag gaggttggc ccgtgtcag  
8881 gcaactgtgc gtggtgtgca ctgttttgc tgcgcaacc cccactggtt ggggcattgc  
8941 caccactgt cagctcctt cgggactt cgtttccc ctccctatt ccacggcga  
9001 actcatgcc gctgcttgc cccgctgct gacagggct cggctgttg gactgacaa  
9061 tccgtggtg ttgtcggga agctgacgt cttccatgg ctgctgctt gttgtccac  
9121 ctgattctg cgcgggact cttctgta cgtcccttg gcccaatc cagcgact  
9181 tcttccgc ggctgctgc cggctctgc gctctcgc cctctcgc cgtctcgc ttcgctca  
9241 gacagtcgg atctcctt ggccgcctc cccgctgga attaatctg cagtcagac  
9301 ctgaaaaac atggagcaat cacaagtagc aatacagcag ctaccaatgc tgattgtgc  
9361 tggctagaag cacaagagga ggaggagtg ggttttca gtcacactc agtacctt  
9421 aagaccaatg acttacaagg cagctgtaga tcttagccac tttttaaag aaaagagggg  
9481 actggaagg ctaattact cccaacgaag acaagatac ctgatctgt ggatctacca  
9541 cacacaagg tacttccctg atagcagaa ctacacacca gggccagggg tcagatacc  
9601 actgacttt ggatggtgt acaagctagt accagttgag ccagataagg tagaagaggc  
9661 caataaagga gagaacacca gcttattaca cctgtgagc ctgcatggga tggatgacc  
9721 ggagagaaa gtttagagt ggagtttga cagccgcta gcaattcact acgtggccc  
9781 agagctgcat cggagtagt tcaagaactc ctgatcga gcttctaca agggacttc  
9841 cgtggggac ttccaggga ggcgtgctt ggggggact gggagtggc gacccctag  
9901 atctgcata taagcagct cttttgct gtaactggc tctctgta gaccagatc  
9961 gagcctggga gctctgctg taactaggga acccactgct taagctcaa taaagcttc  
10021 ctgagtgct tcaagtgtg tctcccctc tttgtgtg ctctgtaac tagatccc  
10081 tcagaccctt ttatcagtg tggaaaatct ctacagtag tagtcatct catcttata  
10141 ttagtattt ataactgca aagaatgaa taccagagag tgagaggct tgacattgt  
10201 agccttttac cgtcaccct tagctagagc ttggcgtaat catgctata gcttttct  
10261 gttgaaatt gttaccgct cacaattca cacaatac gagccggaag cataaagt  
10321 aaagcctggg gtgcctaatg agtgagctaa ctacataa ttgctgtgc ctactccc

10381 gctttccagt cgggaaacct gtcgtgccag ctgcattaat gaatcgcca acgcgcgggg  
10441 agaggcgggt tgcgtattgg gcgctctcc gttcctcgc tcaactgact gctgcgctcg  
10501 gtcgttcggc tgcggcgagc ggatcagct cactcaaaagg cggtaatagc gttatccaca  
10561 gaatcagggg ataacgcagg aaagaacatg tgagcaaaag gccagcaaaa ggccagggaac  
10621 cgtaaaaagg ccgcgttgc ggcgttttc cataggctcc gccccctga cgagcatcac  
10681 aaaaatcgac gctcaagtca gaggtggcga aaccgacag gactataaag ataccaggcg  
10741 tttcccctg gaagctcct cgtgcgctct cctgttcoga ccctgccgct taccggatac  
10801 ctgtccgct tctcccctc gggaagcgtg gcgcttctc atagctcac ctgtaggat  
10861 ctacgtcgg tgtaggctgt tcgctccaag ctgggctgtg tgcacgaacc ccccgctcag  
10921 cccgaccgct gcgccttate cggtaactat cgtctgagt ccaaccggg aagcacgac  
10981 ttatcgccac tggcagcagc cactggtaac aggattagca gagcgggta tgtaggcgg  
11041 gctacagagt tctgaagtg gtggcctaac tacgctaca ctagaagaac agtatttgg  
11101 atctgcgctc tgcgaaacc agttacctc ggaaaaagag ttgtagctc ttgatccggc  
11161 aacaaacca ccgctgtag cggtttttt gttgcaagc agcagattac gcgcagaaaa  
11221 aaggatctc aagaagatcc ttgatcttt tctcggggg ctgacgctca gtggaacgaa  
11281 aactcacgtt aagggaattt ggtcatgaga ttatcaaaaa ggatctcac ctgatcctt  
11341 ttaaattaa aatgaagttt taaataatc taaagtatat atgagtaaac ttggtctgac  
11401 agttaccaat gcttaacag tgaagcact atctcagcga tctgtctatt tcttcatc  
11461 atagttgctt gactcccctg cgtgtagata actcagatac gggaggcgtt accatctggc  
11521 cccagtgcgt caatgatacc gcgagacca cgtcaccgg ctccagattt atcagaata  
11581 aaccagccag ccggaagggc cgagcgcaga agtggctcct caactttatc cgcctccatc  
11641 cagtctatta attgttccg ggaagctaga gtaagtagt cgcagttaa tagtttgcg  
11701 aacgttggc ccattgctac aggcacgtg gtgacgctc cgtcgttgg tatggctca  
11761 ttcagctccg gttccaacg atcaaggcga gttacatgat cccccatgtt gtgcaaaaa  
11821 gcggttagct cctcggctc tccgatcgtt gtcagaagta agttggccgc agtgtatca  
11881 ctcatggta tggcagcact gcataattct cttactgtca tccatcctt aagatgctt  
11941 tctgtgactg gtgagtact aaccaagtca ttctgagaat agtgtatgcg gcgaccgagt  
12001 tgccttggc cggcgtaaat acgggataat accgcgccac atagcagaac tttaaaagt  
12061 ctcatcattg gaaaacgttc ttcggggcga aaactctcaa ggatcttacc gctgttga  
12121 tccagttcga tgaaccac tctgacacc aactgatctt cagcatctt tacttacc  
12181 agcgttctg ggtgagcaaa aacaggaagg caaaatgccg caaaaaggg aataaggcg  
12241 acacggaat gttgaatac cactcttc ctttcaat attattgaag catttatcag  
12301 ggtattgtc tcatgagcg atacatattt gaatgattt agaaaaata acaaataggg  
12361 gttccgcgca cattcccgc aaaagtgcc cctgacgtcg acggatcggg agatcaact  
12421 gttattgca gcttataatg gttacaata aagcaatagc atcacaatt tcacaataa  
12481 agcattttt tcaactgatt ctagtgtgg ttgtccaaa ctcatcaatg tatctatca  
12541 tgtctgac aactggataa ctcaagctaa ccaaatcat ccaaacctc ccaccata  
12601 ccctattacc actgcaatt acctagtgtt ttacttact ctaaactct gattcctctg  
12661 aattatttc atttaaga aattgtattt gttaaatag tactacaac tttagtatt  
12721 taaagaaat tgtatttgtt aaatatgtac tacaactta gtatg

//

## Sequence of pLVX-MCP-EYFP in GenBank format

LOCUS pLVX\_MCP\_EYFP 9924 bp ds-DNA circular 30-DEC-2015  
DEFINITION Lentiviral vector for doxycycline-inducible expression of a gene in  
cells containing the Tet-On 3G transactivator protein.  
ACCESSION .  
VERSION .  
KEYWORDS pLVX-TRE3G  
SOURCE synthetic DNA construct  
ORGANISM synthetic DNA construct  
REFERENCE 1 (bases 1 to 7819)  
AUTHORS Clontech  
TITLE Direct Submission  
JOURNAL Exported Friday, Jun 27, 2014 from SnapGene Viewer 2.4.2  
<http://www.snapgene.com>  
COMMENT  
COMMENT



COMMENT ApEinfo:methylated:1  
FEATURES Location/Qualifiers  
misc\_feature 3508..4674  
/label=MCP-EYFP  
/ApEinfo\_fwdcolor=cyan  
/ApEinfo\_revcolor=green  
/ApEinfo\_graphicformat=arrow\_data {{0 1 2 0 0 -1}} {} 0  
width 5 offset 0  
LTR 1..634  
/note="5' LTR"  
/note="5' long terminal repeat (LTR) from HIV-1"  
/label=5' LTR  
/ApEinfo\_fwdcolor=pink  
/ApEinfo\_revcolor=pink  
/ApEinfo\_graphicformat=arrow\_data {{0 1 2 0 0 -1}} {} 0  
width 5 offset 0  
misc\_feature 681..806  
/note="HIV-1 psi"  
/note="packaging signal of human immunodeficiency virus  
type 1"  
/label=HIV-1 psi  
/ApEinfo\_fwdcolor=pink  
/ApEinfo\_revcolor=pink  
/ApEinfo\_graphicformat=arrow\_data {{0 1 2 0 0 -1}} {} 0  
width 5 offset 0  
misc\_feature 1303..1536  
/note="RRE"  
/note="The Rev response element (RRE) of HIV-1 allows for  
Rev-dependent mRNA export from the nucleus to the  
cytoplasm."  
/label=RRE  
/ApEinfo\_fwdcolor=pink  
/ApEinfo\_revcolor=pink  
/ApEinfo\_graphicformat=arrow\_data {{0 1 2 0 0 -1}} {} 0  
width 5 offset 0  
misc\_feature 2028..2144  
/note="cPPT/CTS"  
/note="central polypurine tract and central termination  
sequence of HIV-1 (lacking the first T)"  
/label=cPPT/CTS  
/ApEinfo\_fwdcolor=pink  
/ApEinfo\_revcolor=pink  
/ApEinfo\_graphicformat=arrow\_data {{0 1 2 0 0 -1}} {} 0  
width 5 offset 0  
promoter 4709..5208  
/note="PGK promoter"  
/note="mouse phosphoglycerate kinase 1 promoter"  
/label=PGK promoter  
/ApEinfo\_fwdcolor=pink  
/ApEinfo\_revcolor=pink  
/ApEinfo\_graphicformat=arrow\_data {{0 1 2 0 0 -1}} {} 0  
width 5 offset 0  
promoter 2209..3425  
/label=hUbc\_promoter  
/ApEinfo\_fwdcolor=pink  
/ApEinfo\_revcolor=pink  
/ApEinfo\_graphicformat=arrow\_data {{0 1 2 0 0 -1}} {} 0  
width 5 offset 0  
CDS 5229..5828  
/codon\_start=1  
/gene="pac from Streptomyces alboniger"  
/product="puromycin N-acetyltransferase"  
/note="PuroR"  
/note="confers resistance to puromycin"  
/translation="MTEYKPTVRLATRDDVPRAVRTLAAAFADYPATRH TVDPDRHIE  
R  
VTELQELFLTRVGLDIGKVWVADDGAAVAVWTTPESEAGAVFAEIGPRMAELSGSRL  
A  
AQQQMEGLLAPHRKPEAWFLATVGVSPDHQKGLGSAVVLPVVEAAERAGVPAFLET  
S APRNLPFYERLGFVTADVEVPEGPRTWCMTRKPGA"

```

        /label=puromycin N-acetyltransferase
        /ApEinfo_fwdcolor=pink
        /ApEinfo_revcolor=pink
        /ApEinfo_graphicformat=arrow_data {{0 1 2 0 0 -1}} {} 0
        width 5 offset 0
misc_feature 5846..6434
        /note="WPRE"
        /note="woodchuck hepatitis virus posttranscriptional
        regulatory element"
        /label=WPRE
        /ApEinfo_fwdcolor=pink
        /ApEinfo_revcolor=pink
        /ApEinfo_graphicformat=arrow_data {{0 1 2 0 0 -1}} {} 0
        width 5 offset 0
LTR 6642..7275
        /note="3' LTR"
        /note="3' long terminal repeat (LTR) from HIV-1"
        /label=3' LTR
        /ApEinfo_fwdcolor=pink
        /ApEinfo_revcolor=pink
        /ApEinfo_graphicformat=arrow_data {{0 1 2 0 0 -1}} {} 0
        width 5 offset 0
rep_origin complement(7806..8391)
        /direction=LEFT
        /note="ori"
        /note="high-copy-number ColE1/pMB1/pBR322/pUC origin of
        replication"
        /label=ori
        /ApEinfo_fwdcolor=pink
        /ApEinfo_revcolor=pink
        /ApEinfo_graphicformat=arrow_data {{0 1 2 0 0 -1}} {} 0
        width 5 offset 0
CDS complement(8562..9422)
        /codon_start=1
        /gene="bla"
        /product="beta-lactamase"
        /note="AmpR"
        /note="confers resistance to ampicillin, carbenicillin,
        and related antibiotics"
        /translation="MSIQHFRVALIPFFAAFCLPVFAHPETLVKVKDAEDQLGARVGY
        I
        ELDLNSGKILESFRPEERFPMMSSTFKVLLCGAVLSRIDAGQEQLGRRRIHYSQNDLVEY
        S
        PVTEKHLTDGMTVRELCSAAITMSDNTAANLLLTIGGPKELTAFLNMGDHSVTRLDR
        W
        EPELNEAIPNDERDTTMPVAMATTLRKLTTGELLTLASRQQLIDWMEADKVAGPLLR
        A
        LPAGWFIADKSGAGERGSRGIIAALGPDGKPSRIVVIYTTGSQATMDERNRQIAEIGA
        S LIKHW"
        /label=beta-lactamase
        /ApEinfo_fwdcolor=pink
        /ApEinfo_revcolor=pink
        /ApEinfo_graphicformat=arrow_data {{0 1 2 0 0 -1}} {} 0
        width 5 offset 0
misc_feature 3538..3564
        /translation="MGPKKRKRKVGYPYDVPDYAIEGRHMLAVKMASNFTQFVLVDNNG
        TGDVTVAPSNFANGIAEWISSNSRSQAYKVTCVSRQSSAQNRYTIKVEVPKGAWRSY
        LNMELTIPIFATNSDCELVKAMQGLLKDGNPIPSAIAANSIYADSRMVSKGEELFT
        GVVPIVELDGDVNGHKFSVSGEGEDATYGKLTCLKFICTTGKLPVPWPPTLVTTFGYG
        LQCFARYPDHMKQHDFKFSAMPEGYVQERTIFFKDDGNYKTRAEVKFEGDTLVNRIEL
        KGIDFKEDGNILGHKLEYNYNSHNVYIMADKQKNGIKVNFKIRHNIEDGSVQLADHYQ
        QNTPIGDGVPVLLPDNHYLSYQSALS KDPNEKRDMVLEFVTAAGITLGMDELK*"
        /label=HA
        /ApEinfo_fwdcolor=pink
        /ApEinfo_revcolor=pink
        /ApEinfo_graphicformat=arrow_data {{0 1 2 0 0 -1}} {} 0
        width 5 offset 0
polyA_signal 9575..9709
        /note="SV40 poly(A) signal"
        /note="SV40 polyadenylation signal"

```

```

/label=SV40 poly(A) signal
/ApEinfo_fwdcolor=pink
/ApEinfo_revcolor=pink
/ApEinfo_graphicformat=arrow_data {{0 1 2 0 0 -1} {} 0}
width 5 offset 0
gene      3961..4668
/label=EYFP
/translation="MGPKKKRKVGYPYDVPDYAIEGRHMLAVKMASNFTQFVLDNNG
TGDVTVAPSNFANGIAEWISSNSRSQAYKVTCSVRQSSAQNRKYTIKVEVPKGAWRSY
LNMELTIPIFATNSDCELVKAMQGLLKDGNPIPSAIAANSYIADSRMVSKGEELFT
GVVPILVELDGDVNGHKFSVSGEGEDATYKGLTLKFICTTGKLPVPWPTLVTTFGYG
LQCFARYPDHMKQHDFFKSAMPEGYVQERTIFFKDDGNYKTRAEVVKFEGDTLVNRIEL
KGIDFKEDGNILGHKLEYNYNSHNVYIMADKQKNGIKVNFKIRHNIEDGSVQLADHYQ
QNTPIGDGVPVLLPDNHYLSYQSALS KDPNEKRDMVLLLEFVTAAGITLGMDELYK*"
/label=EYFP
/ApEinfo_fwdcolor=#ff8040
/ApEinfo_revcolor=pink
/ApEinfo_graphicformat=arrow_data {{0 1 2 0 0 -1} {} 0}
width 5 offset 0
misc_feature 3514..3537
/label=SV40 NLS
/ApEinfo_fwdcolor=#ff8080
/ApEinfo_revcolor=green
/ApEinfo_graphicformat=arrow_data {{0 1 2 0 0 -1} {} 0}
width 5 offset 0

```

ORIGIN

```

1  tggagggct aattcactcc caaagaagac aagatatcct tgatctgtgg atctaccaca
61  cacaaggcta ctccctgat tagcagaact acacaccagg gccaggggct agataccac
121  tgaccttgg atggtgctac aagctagtac cagttgagcc agataaggta gaagaggcca
181  ataaaggaga gaacaccagc ttgttacacc ctgtgagcct gcatgggatg gatgaccggg
241  agagagaagt gttagagtgg aggtttgaca gccgcctagc attcatcac gtggcccgag
301  agctgcatcc ggagtacttc aagaactgct gatatcgagc ttgtacaag ggactttccg
361  ctggggactt tccagggagg cgtggcctgg cggggactgg ggagtggcga gccctcagat
421  cctgcatata agcagctgct tttgctgt actgggtctc tctggtaga ccagatctga
481  gctgggagc tctctggcta actagggaac cactgctta agcctcaata aagcttgcct
541  tgagtcttc aagtagtctg tggcctctc ttgtgtgact ctgtaacta gagatccctc
601  agacccttt agtcagtgtg gaaaatctct agcagtggcg cccgaacagg gacttgaag
661  cgaaggaggaa accagaggag cctctcgac gcaggactcg gctgctgaa gcgcgcacgg
721  caagaggcga gggggcgga ctggtgagta cgccaaaaat ttgactagc ggaggctaga
781  aggagagaga tgggtgcgag agcgtcagta ttaagcgggg gagaattaga tcgcatggg
841  aaaaaatcg gtaaggcca gggggaaaga aaaaataata attaaaacat atagatggg
901  caagcaggga gctagaacga ttcgcagta atcctggcct gttagaaca tcagaaggct
961  gtagacaaat actgggacag ctacaacat ccttcagac aggatcagaa gaacttagat
1021 cattataaa tacagtagca accctctatt gtgtgcatca aaggatagag ataaaagaca
1081 ccaagggaag tttagacaag atagaggaag agcaaaaaca aagtaagacc accgcacagc
1141 aagcggccgg ccgctgatct tcagacctgg aggaggagat atgagggaca atggagaag
1201 tgaattatat aaatataaag tagtaaaaat tgaaccatta ggagtgcac ccaccaaggc
1261 aaagagaaga gtggtgcaga gaaaaaaaag agcagtggga ataggagctt tttccttgg
1321 gttcttggga gcagcaggaa gcaactatgg gcgagcgtca atgacgctga cggatcacgg
1381 cagacaalta ttgtctgta tagtgacga gcagaacaat ttgctgaggg ctattgaggc
1441 gcaacagcat ctgttgaac tcacagtctg gggcatcaag cagctccagg caagaatcct
1501 ggctgtggaa agatacctaa aggatcaaca gctcctgggg atttggggtt gctctggaaa
1561 actcatttgc accactgctg tgcttggaa tgctagtgg agtaataaat ctctggaaac
1621 gatttgaat cacacgacct ggatggagtg ggacagagaa ataaacatt acacaagctt
1681 aatacactcc ttaattgaag aatcgcaaaa ccagcaagaa aagaatgaac aagaattatt
1741 ggaattagat aaatgggcaa gtttgggaa ttggttaac ataacaatt ggctgtgga
1801 tataaaatta ttcataatga tagtaggagg ctggttaggt ttaagaatg ttttctctg
1861 actttctata gtgaatagag ttaggcaggg atattacca ttatcttcc agaccacct
1921 ccaaccaccg aggggacccg acaggcccga aggaatagaa gaagaagtg gagagagaga
1981 cagagacaga tccattcgat tagtgaacgg atctcgacgg tctgccttt aaaagaaaag
2041 gggggattgg ggggtacagt gcaggggaaa gaatagtaga cataatagca acagacatac
2101 aaactaaaga actcaaaaa caaattaca aaattcaaaa tttcgggtt tattacaggg
2161 acagcagaga tccagttat cgatgaggcc cttctgctt cactgagGA TCTGGCCTCC
2221 GCGCCGGGTT TTGGCGCCTC CCGCGGGCGC CCCCTCCTC ACGGCGAGCG CTGCCACGTC
2281 AGACGAAGGG CGCAGCGAGC GTCCTGATCC TTCCGCCCGG ACGCTCAGGA CAGCGGCCCC
2341 CTGCTCATAA TACTCGGCCCT TAGAACCCCA GTATCAGCAG AAGGACATTT TAGGACGGGA
2401 CTTGGGTGAC TACTAGGCAC TGGTTTTCTT TCCAGAGAGC GGAACAGGCG AGGAAAAGTA
2461 TCCCTTCTC GCGATTCTG CGGAGGGATC TCCGTGGGGC GGTGAACGCC GATGATTATA
2521 TAAGGACGCG CCGGGTGTGG CACAGCTAGT TCCGTCGCAG CCGGGATTG GGTCCGGGTT
2581 CTGTTTGTG GATCGCTGTG ATCGTCACTT GGTGAGTAGC GGGCTGCTGG GCTGGCCGGG

```

2641 GCTTTCGTGG CCGCCGGGCC GCTCGGTGGG ACGGAAGCGT GTGGAGAGAC CGCCAAGGGC  
2701 TGTAAGTCTGG GTCCCGGAGC AAGGTTGCC TGAAGTGGG GTTGGGGGGA GCGCAGCAA  
2761 ATGGCCGGTG TTCCCGAGTC TTGAATGGAA GACGCTGTG AGGCGGGCTG TGAGGTCTGT  
2821 GAAACAAGGT GGGGGGCATG GTGGGCGGCA AGAACCCAAG GTCTTGAGGC CTTGCTAAT  
2881 GCGGAAAGC TCTTATTCGG GTGAGATGGG CTGGGGCACC ATCTGGGGAC CCTGACGTGA  
2941 AGTTTGTAC TACTGGAGA ACTCGGGTTT GTCGTCTGGT TGCGGGGGCG GCAATTATGC  
3001 GGTGCCGTTG GGCAGTGCAC CCGTACCTTT GGGAGCGCGC GCCTCGTCTG GTCGTGACGT  
3061 CACCCGTTCT GTTGGCTTAT AATGCAGGT GGGGCCACCT GCCGGTAGGT TGCGGGTAGG  
3121 CTTTTCTCCG TCGCAGGACG CAGGGTTCGG GCCTAGGGTA GGCTCTCTG AATCGACAGG  
3181 CGCCGGACCT CTGGTGAGG GAGGGATAAG TGAGGCGTCA GTTTCTTTGG TCGGTTTTAT  
3241 GTACCTATCT TCTAAGTAG CTGAAGCTCC GGTTTTGAAC TATGCGCTCG GGGTTGGCGA  
3301 GTGTGTTTTG TGAAGTTTTT TAGGCACCTT TTGAAATGTA ATCATTGGG TCAATATGTA  
3361 ATTTTCAGTG TTAGACTAGT AAATTGTCCG CTAAATTCTG GCCGTTTTTG GCTTTTTTTG  
3421 TAGACGAAGC TTGGGCTGCA GGTGAGCTC AAGCTTCGAA TTCTGCAGTC GACGTACCG  
3481 CGGGCCCGGG ATCCACCGGT CGCCACCATG GGCCAAAAA AGAAAAGAAA AGTTGGCTAC  
3541 CACCCGTTCT GTTGGCTTAT AATGCAGGT GGGGCCACCT GCCGGTAGGT TGCGGGTAGG  
3601 TCTAACTTTA CTCAGTTCGT TCTCGTGCAC AATGGCGGAA CTGGCGACGT GACTGTGCGC  
3661 CCAAGCAACT TCGCTAACGG GATCGCTGAA TGGATCAGCT CTAAGTCCG TTCACAGGT  
3721 TACAAAAGTAA CCTGTAGCGT TCGTACAGC TCTGCGCAGA ATCGCAAATA CACCATCAAA  
3781 GTCGAGGTGC CTAAGGCGC CTGGCGTTC TACTTAAATA TGAACATAA CATTCAATT  
3841 TTCGCCACGA ATTCGACTG CGAGCTTATT GTTAAGCAA TGCAAGGTCT CTAAGGATG  
3901 GGAACCCGA TTCCCTCAGC AATCGCAGCA AACTCCGGA TCTACGCGGA TTCTAGAATG  
3961 GTGAGCAAGG GCGAGGAGCT GTTACCGGG GTGGTGGCCA TCCTGGTCTG GCTGGACGGC  
4021 GACGTAACG GCCACAAGT CAGCGTGTCC GGCGAGGGCG AGGGCGATGC CACTACGGC  
4081 AAGCTGACCC TGAAGTTTAT CTGCACCAC GGCAAGCTGC CCGTGCCCTG GCCCACCTC  
4141 GTGACCACCT TCGGCTACGG CTGCACTGC TTCGCCGCT ACCCCGACCA CATGAAGCAG  
4201 CACGACTTCT TCAAGTCCG CATGCCGAA GGCTACGTC AGGAGCGCAC CATCTTCTC  
4261 AAGGACGAC GCAACTACAA GACCCGCGC GAGGTGAAGT TCGAGGGCGA CACCCTGGTG  
4321 AACCGACTC AGCTGAAGG CATCGACTT AAGGAGCAG GCAACATCTT GGGGACAAAG  
4381 CTGGAGTACA ACTACAACAG CCACAACGTC TATATCATGG CCGACAAGCA GAAGAACGGC  
4441 ATCAAGGTGA ACTTCAAGAT CCGCCACAAC ATCGAGGACG GCAGCGTGA GCTCGCCGAC  
4501 CACTACCAGC AGAACACCC CATCGGCGC GGCCCGTGC TGCTGCCCGA CAACACTAC  
4561 CTGAGTACC AGTCCGCCCT GAGCAAAGC CCAACGAGA AGCGGATCA CATGGCTCTG  
4621 CTGGAGTTCG TGACCGCCG CGGGATCACT CTCGGCATGG ACGAGCTGTA CAAGTAAAta  
4681 ATAGTAATCA ATTACGGGga attctaccg gtaggggagg cgttttccc aaggcagtct  
4741 ggagcatcgc ctttagcagc cccgctgggc acttggcgt acacaagtgg cctctggct  
4801 cgcacacatt ccacatccac cggtaggcgc caaccggctc cgtttttgg tggcccttc  
4861 ggcaccactt ctactctcc ctagtcagg aagtccccc cgcceccga gctcgcgtc  
4921 tgcaggagct gacaaatgga agtagcacgt ctactatc tctgcagat ggacagcacc  
4981 gctgagcaat ggaagcgggt aggcctttg ggcagcggcc aatgacagt ttgctcttc  
5041 gctttctggg ctacagagct gggaaagggg gggctccggg ggggctcag gggcgggctc  
5101 aggggggggg cggcgccccg aaggtctcc gaggccccg cattctcac gttcaaaag  
5161 cgcagctctg ccgctgtgt ctctctcc tcatctccg gcctttcag ctgagccca  
5221 agttaccat gaccagtagc aagcccacgg tgcgctcgc caccgagcag gactcccca  
5281 gggcctagc caccctcgc cccgcttgc cagactacc cgcacagcgc cacaccgtc  
5341 atccggagc ccacatcgag cgggtcacgc agctgcaaga actctctc acgctcgtc  
5401 ggctcgaat cgcgaagtg tggctcggg acgagcgcgc cggctggcg gctgggaca  
5461 cggcgagag cgtcgaagc gggcggtgt tgcagagat cggccccgc atggcagat  
5521 tgagcgttc cggctggcc cgcagcaac agatggaag cctctggcg cgcaccggc  
5581 ccaagagcc cgcgtgttc ctggccacc tgcgctctc gcccaccag caggcaagg  
5641 gctgggcag cgcctcgtc ctccccggg tggagcgcgc cagcgcgc cgggtgccc  
5701 cctctgga gactccgc cccgcaacc tcccttcta cagcgcgtc ggttaccg  
5761 tcaccgca cgtcagagtg cccgaaggac cgcacactg gtcagacc cgaagccc  
5821 gtcctgac gggcgcgtc ggaacaata accttgat taaaaatt gtgaagatt  
5881 gactggtatt ctaactatg ttgctctt tacgctatg ggatacctg cttaatgcc  
5941 tttgatcat gctattgct cccgtatgg ttcaattt tectctgt ataatctg  
6001 gttctgtct cttatgagg agttgtgccc cgttgcagg caactggcg tggctgca  
6061 tttgttct gacgcaacc ccactggtg gggcattgcc accactgtc agctcttct  
6121 cgggacttc gtttcccc tccctatgc cagcgggaa ctcatcgc cctgcttgc  
6181 ccgctcgtg acaggggctc ggctgttgg cactgcaat tccgtgtgt tctggggaa  
6241 gctgagctc ttccatggc tctcctg tttgccacc tggattctc gcgagcgtc  
6301 ctctctac gtccttgc ccctcaatc agcggactt ccttccgc gctctgctc  
6361 ggctctcgg ccttccgc gttctgct tgcctcag acgagtgga tctcttgg  
6421 ggccgctcc ccgctggaa ttaattctc agtcagacc tagaaaaa tggagaatc  
6481 acaagtagc atacagcgc taccaatgct gattgtcct ggctagaagc acaagaggag  
6541 gaggaggtg gttttccag tcacactca ggtacttta agacaaatg cttacaagg  
6601 agctgtag cttagcact ttttaaaa aaaggggga ctggaaggc taattactc  
6661 ccaacgaaga caagatccc ttgatctg gatctacc acacaaggct acttcccta  
6721 ttgacgaac tacacaccg ggccaggggt cagatatca ctgacttgg gatgtgcta  
6781 caagtagta ccagttgagc cagataagg agaagaggcc aataaaggag agaaccacc

6841 cttgttacac cctgtgagcc tgcattggat ggcagaccgc gagagagaag tgttagagtg  
6901 gaggtttgac agccgcctag catttcatca cgtggcccga gagctgcatc cggagfacct  
6961 caagaactgc tgatctgag cttgctaca gggactttcc gctggggact ttccagggag  
7021 gcgtggcctg ggcgggactg gggagtgccg agccctcaga tcctgcatat aagcagctg  
7081 tttttgctg tactgggtct ctctggttag accagatctg agcctgggag ctctctggct  
7141 aactaggaa cccactgctt aagcctcaat aaagcttgc ttgagtgtt caagttagt  
7201 gtgcccgtct gttgtgtgac tctgtaact agagatcct cagaccctt tagtcagtgt  
7261 ggaaaatctc tagcagtagt agttcatgtc atcttattat tcagtattta taacttgcaa  
7321 agaatgaat atcagagagt gagaggcctt gacattgcta gcgtttacc gtcgacctc  
7381 agctagagct tggcgtaatc atggctatag ctgtttcctg tgtgaaattg ttatccgctc  
7441 acaattccac acaacatac agccgggagc ataaagtga aagcctgggg tgcctaata  
7501 gtgagctaac tcacattaat tgcgttgcgc tcactgccc cttccagtc gggaaacctg  
7561 tctgcccagc tgcattaatg aatcgccaa cgcgcgggga gaggcggttt gcgtattggg  
7621 cgctctccg ctctctgct cactgactc gtcgctcgg tcttccggct gcggcagcg  
7681 gtatcagctc actcaaaagg ggtatacgg ttatccacag aatcagggga taacgagga  
7741 aagaacatgt gagcaaaagg ccagcaaaag gccaggaacc gtaaaaaagg cgcgttgtg  
7801 gcgttttcc ataggctccg ccccctgac gagcatcaca aaaatcgacg ctcaagttag  
7861 aggtggcga acccgacagg actataaaga taccagcgtt tccccctgg aagctccctc  
7921 gtgctctc ctgttccg cctccgctt accggatacc tgtccgctt tctccctc  
7981 ggaagcgtg cgctttctca tagtcacgc ttaggtatc tcaattcgtt gtaggtcgtt  
8041 cgctccaagc tgggtgtgt gcacgaacc cccgttccg cgcaccgctg gccttatcc  
8101 ggtaactatc gtcttgagtc caaccggta agacagact tctccact gccagcagcc  
8161 actgtaaca ggattagcag agcgaggtat gtaggcggtg ctacagagt cttgaagtgg  
8221 tggcctaact acggctacac tagaagaaca gtatttgta tctgctct gctgaagcca  
8281 gttaccttcg gaaaaagagt tggtagctct tcatccgca aacaaccac cctggttagc  
8341 ggttttttg tttgcaagc gcagattac gcagaaaaa aagatctca agaagatct  
8401 ttgatcttt ctacggggtc tgacgctcag tggaaacaaa actcagctta aggattttg  
8461 gtcagagat tatcaaaaag gatcttacc tagatcttt taaataaaa atgaagttt  
8521 aaatcaatc aaagtataa tgaagaaat tggctgaca gttaccaatg cttaatcagt  
8581 gaggcaccta tctcagcag ctgtctattt cgttcatcca tagttgctg actccccctc  
8641 gttgagata ctacgatac ggagggctta ccatctgccc ccagtctgc aatgatacc  
8701 cgagaccac gctcaccgc tccagattta tcagcaataa accagccagc cggaaaggcc  
8761 gagcgcagaa gtggtctgc aactttacc gcctccatcc agtctattaa ttgttccgg  
8821 gaagctagag taagtattc gccagtaat agtttgcga acgttgttc cattgtaca  
8881 ggcatcgtg tctcagctc gtcgttgg atggttcat tcagctcgg tcccaacga  
8941 tcaaggcag ttacatgat cccatggtg tgcaaaaaag cgttagctc ctctgctc  
9001 ccgatcgtg tcagaagtaa gttggcgcga gtttatcac tcatggtat gccagcactg  
9061 cataattctc ttactgtcat gccatccgta agatgcttt ctgtgactgg tgagtactca  
9121 accaagtcat tctgagaata gtgtatcgg cgaccgagt gctcttccc ggcgtcaata  
9181 cgggataata ccgcccaca tagcagaact taaaagtgc tcatcattgg aaacgttct  
9241 tggggcga aactctcaag gatctaccg ctgttagat ccagttcag gtaaccact  
9301 cgtgcacca actgatttc agcatcttt actttacca gcgtttctgg gtgagcaaaa  
9361 acaggaaggc aaaatgccg aaaaaagga ataaaggcga cacggaaatg tgaataact  
9421 atactctcc ttttcaata ttattgaagc attatcagg gttattgct catgagcga  
9481 tacatattg aatgtattt gaaaaataa caaataggg tcccgcac atttccccg  
9541 aaagtccac ctgacgtcga cggatcggga gatcaactg ttattgacg ctataatgg  
9601 ttacaaataa agcaatagca tcacaaatt cacaaataa gcatttttt cactgattc  
9661 tagttgtgt ttgtcaaac tcatcaatg atcttcat gctggatca actggatac  
9721 tcaagtaac caaatcatc ccaacttcc caccatac cctattacca ctgcaatta  
9781 cctagtgtt tcaattact taaactgtg attcctcga attatttca tttaaagaa  
9841 attgtattg ttaaatatg actacaaact tagtagttt taaagaaat gtatttgta  
9901 aatgttact acaacttag tagt

//

## Sequence of pLVX-PCP-tagRFP in GenBank format

LOCUS pLVX\_PCP\_tagRFP 9933 bp ds-DNA circular 30-DEC-2015  
DEFINITION Lentiviral vector for doxycycline-inducible expression of a gene in  
cells containing the Tet-On 3G transactivator protein.  
ACCESSION .  
VERSION .  
KEYWORDS pLVX-TRE3G

SOURCE synthetic DNA construct  
 ORGANISM synthetic DNA construct  
 REFERENCE 1 (bases 1 to 7819)  
 AUTHORS Clontech  
 TITLE Direct Submission  
 JOURNAL Exported Friday, Jun 27, 2014 from SnapGene Viewer 2.4.2  
<http://www.snapgene.com>

COMMENT  
 COMMENT  
 COMMENT ApEinfo:methylated:1

FEATURES Location/Qualifiers

misc\_feature 3508..4683  
 /label=PCP-tagRFP  
 /ApEinfo\_fwdcolor=cyan  
 /ApEinfo\_revcolor=green  
 /ApEinfo\_graphicformat=arrow\_data {{0 1 2 0 0 -1}} {} 0  
 width 5 offset 0

LTR 1..634  
 /note="5' LTR"  
 /note="5' long terminal repeat (LTR) from HIV-1"  
 /label=5' LTR  
 /ApEinfo\_fwdcolor=pink  
 /ApEinfo\_revcolor=pink  
 /ApEinfo\_graphicformat=arrow\_data {{0 1 2 0 0 -1}} {} 0  
 width 5 offset 0

misc\_feature 681..806  
 /note="HIV-1 psi"  
 /note="packaging signal of human immunodeficiency virus type 1"  
 /label=HIV-1 psi  
 /ApEinfo\_fwdcolor=pink  
 /ApEinfo\_revcolor=pink  
 /ApEinfo\_graphicformat=arrow\_data {{0 1 2 0 0 -1}} {} 0  
 width 5 offset 0

misc\_feature 1303..1536  
 /note="RRE"  
 /note="The Rev response element (RRE) of HIV-1 allows for Rev-dependent mRNA export from the nucleus to the cytoplasm."  
 /label=RRE  
 /ApEinfo\_fwdcolor=pink  
 /ApEinfo\_revcolor=pink  
 /ApEinfo\_graphicformat=arrow\_data {{0 1 2 0 0 -1}} {} 0  
 width 5 offset 0

misc\_feature 2028..2144  
 /note="cPPT/CTS"  
 /note="central polypurine tract and central termination sequence of HIV-1 (lacking the first T)"  
 /label=cPPT/CTS  
 /ApEinfo\_fwdcolor=pink  
 /ApEinfo\_revcolor=pink  
 /ApEinfo\_graphicformat=arrow\_data {{0 1 2 0 0 -1}} {} 0  
 width 5 offset 0

misc\_feature 3514..3537  
 /translation="MGPKKKRKGYPYDVPDYAIEGRHMLASKTIVLSVGEATRRLTE  
 IQSTADRQIFEEKVGPLVGRRLRLTASLRQNGAKTAYRVNLKLDQADVVDVSGLPKVRYS  
 QVWVSHDVTIVANSTEASRKSLEYDLTKSLVATSQVEDLVVNLVPLGRADPLASKTIVLS  
 VGEATRRLTEIQSTADRQIFEEKVGPLVGRRLRLTASLRQNGAKTAYRVNLKLDQADV  
 DSGLPKVRYSQVWVSHDVTIVANSTEASRKSLEYDLTKSLVATSQVEDLVVNLVPLGRPP  
 VATMVSKGEELFTGVVPILVELDGDVNGHKFSVSGEGEDATYGKLTGKLFICTTGKLP  
 VPWPTLVTTLTYGVCFSRYPDHMKQHDFFKSAMPEGYVQERTIFFKDDGNYKTRAEV  
 KFEGDTLVNRIELKGFIDFKEDGNILGHKLEYNYNSHNVYIMADKQKNGIKVNFKIRHN  
 IEDGSVQLADHYQQNTPIGDGPVLLPDNHYLSTQSALS KDPNEKRDMVLLLEFVTAAG  
 ITLGMDELYK\*"  
 /label=SV40 NLS  
 /ApEinfo\_fwdcolor=pink  
 /ApEinfo\_revcolor=pink  
 /ApEinfo\_graphicformat=arrow\_data {{0 1 2 0 0 -1}} {} 0  
 width 5 offset 0

misc\_feature 3538..3564

```

/translacion="MGPKKKRVGYPYDVPDYAIEGRHMLASKTIVLSVGEATRTLTE
IQSTADRQIFEEKVGPLVGRRLRTASLRQNGAKTAYRVNLKLDQADVVDVSGLPKVRVT
QVWVSHDVTIVANSTEASRKSLYDLTKSLVATSQVEDLVVNLVPLGRADPLASKTIVLS
VGEATRTLTEIQSTADRQIFEEKVGPLVGRRLRTASLRQNGAKTAYRVNLKLDQADV
DSGLPKVRVTQVWVSHDVTIVANSTEASRKSLYDLTKSLVATSQVEDLVVNLVPLGRPP
VATMVSKEGELFTGVVPILVELDGDVNGHKFSVSGEGEDATYGKLTLCFICTTGKLP
VPWPTLVTTLYGVQCFSRYPDHMKQHDFFKSAMPEGYVQERTIFFKDDGNYKTRAEV
KFEGDTLVNRIELKGIDFKEDGNILGHKLEYNYNSHNVYIMADKQKNGIKVNFKIRHN
IEDGSVQLADHYQQNTPIGDGPVLLPDNHYLSTQSALS KDPNEKRDMVLLLEFVTAAG
ITLGMDEL YK*"
/label=HA
/ApEinfo_fwdcolor=pink
/ApEinfo_revcolor=pink
/ApEinfo_graphicformat=arrow_data {{0 1 2 0 0 -1}} {} 0
width 5 offset 0
promoter 4718..5217
/note="PGK promoter"
/note="mouse phosphoglycerate kinase 1 promoter"
/label=PGK promoter
/ApEinfo_fwdcolor=pink
/ApEinfo_revcolor=pink
/ApEinfo_graphicformat=arrow_data {{0 1 2 0 0 -1}} {} 0
width 5 offset 0
promoter 2209..3425
/label=hUbc_promoter
/ApEinfo_fwdcolor=pink
/ApEinfo_revcolor=pink
/ApEinfo_graphicformat=arrow_data {{0 1 2 0 0 -1}} {} 0
width 5 offset 0
CDS 5238..5837
/codon_start=1
/gene="pac from Streptomyces alboniger"
/product="puromycin N-acetyltransferase"
/note="PuroR"
/note="confers resistance to puromycin"
/translacion="MTEYKPTVRLATRDDVPRAVRTLAAAFADYPATRHTVDPDRHIE
R
VTELQELFLTRVGLDIGKVWVADDGAAVAVWTTTPESVEAGAVFAEIGPRMAELSGSRL
A
AQQQMEGLLAPHRPKEPAWFLATVGVSPDHQGGKGLGSAVVLPGVEAAERAGVPAFLET
S APRNLPFYERLGFVTADVEVPEGPRTWCMTRKPGA"
/label=puromycin N-acetyltransferase
/ApEinfo_fwdcolor=pink
/ApEinfo_revcolor=pink
/ApEinfo_graphicformat=arrow_data {{0 1 2 0 0 -1}} {} 0
width 5 offset 0
misc_feature 5855..6443
/note="WPRE"
/note="woodchuck hepatitis virus posttranscriptional
regulatory element"
/label=WPRE
/ApEinfo_fwdcolor=pink
/ApEinfo_revcolor=pink
/ApEinfo_graphicformat=arrow_data {{0 1 2 0 0 -1}} {} 0
width 5 offset 0
LTR 6651..7284
/note="3' LTR"
/note="3' long terminal repeat (LTR) from HIV-1"
/label=3' LTR
/ApEinfo_fwdcolor=pink
/ApEinfo_revcolor=pink
/ApEinfo_graphicformat=arrow_data {{0 1 2 0 0 -1}} {} 0
width 5 offset 0
rep_origin complement(7815..8400)
/direction=LEFT
/note="ori"
/note="high-copy-number ColE1/pMB1/pBR322/pUC origin of
replication"
/label=ori
/ApEinfo_fwdcolor=pink

```

```

    /ApEinfo_revcolor=pink
    /ApEinfo_graphicformat=arrow_data {{0 1 2 0 0 -1}} {} 0
width 5 offset 0
CDS      complement(8571..9431)
/codon_start=1
/gene="bla"
/product="beta-lactamase"
/note="AmpR"
/note="confers resistance to ampicillin, carbenicillin,
and related antibiotics"
/translation="MSIQHFRVALIPFFAAFCLPVFAHPETLVKVKDAEDQLGARVGY
I
ELDLNSGKILESFRPEERFPMMSDFKLVLLCGAVLSRIDAGQEQLGRRIHYSQNDLVEY
S
PVTEKHLTDGMTVRELCSAAITMSDNTAANLLLTITGGPKELTAFLEHNMGDHVTSLDR
W
EPELNEAIPNDERDRTMPVAMATTLRKLTTGELLTLASRQQLIDWMEADKVAGPLLRS
A
LPAGWFIADKSGAGERGSRGIIAALGPDGKPSRIVVIYTTGSQATMDERNRQIAEIGA
S LIKHW"
/label=beta-lactamase
/ApEinfo_fwdcolor=pink
/ApEinfo_revcolor=pink
/ApEinfo_graphicformat=arrow_data {{0 1 2 0 0 -1}} {} 0
width 5 offset 0
polyA_signal  9584..9718
/note="SV40 poly(A) signal"
/note="SV40 polyadenylation signal"
/label=SV40 poly(A) signal
/ApEinfo_fwdcolor=pink
/ApEinfo_revcolor=pink
/ApEinfo_graphicformat=arrow_data {{0 1 2 0 0 -1}} {} 0
width 5 offset 0
misc_feature  3970..4677
/label=TagRFP
/ApEinfo_fwdcolor=#ff0000
/ApEinfo_revcolor=green
/ApEinfo_graphicformat=arrow_data {{0 1 2 0 0 -1}} {} 0
width 5 offset 0

```

ORIGIN

```

1  tggaaaggct aattcactcc caaagaagac aagatctct tgatctgtgg atctaccaca
61  cacaaaggcta cttccctgat tagcagaact acacaccagg gccaggggtc agatattcca
121  tgacttttgg atggtgctac aagctagtag cagttgagcc agataaggta gaagaggcca
181  ataaaggaga gaacaccagc ttgttacacc ctgtgagcct gcatgggatg gatgaccggg
241  agagagaagt gttagagtag aggtttgaca gccgcctagc attcatcac gtggcccgag
301  agctgcatcc ggagtacttc aagaactgct gatatcgagc ttgctacaag ggactttccg
361  ctggggactt tccagggagg cgtggcctgg gccgggactgg ggaagtggcga gccctcagat
421  cctgcatata agcagctgct tttgctctg actgggtctc tctggttaga ccagatctga
481  gcctgggagc tctctggcta actagggaac cactgctta agcctcaata aagcttgcct
541  tgagtgtctc aagtgtgtg tgcccgtctg ttgtgtgact ctgtaacta gagatccctc
601  agaccctttt agtcagtgtg gaaaatctct agcagtgccg cccgaacagg gacttgaag
661  cgaaagggaa accagaggag ctctctgac gcaggactcg gcttgcgtaa gcgcgcacgg
721  caagaggcga ggggcggcga ctggtgagta cgccaaaaat ttgactagc ggaggctaga
781  aggagagaga tgggtcggag agcgtcagta ttaagcgggg gagaattaga tcgcgatggg
841  aaaaaattcg gttaaaggca gggggaaaga aaaaataata ataaacaat atagtatggg
901  caagcaggga gctagaacga ttcgcagtta atcctggcct gttagaacaa tcagaaggct
961  gtgacaaaat actgggacag ctacaacat cccttcagac aggatcagaa gaacttagat
1021  cattataaa tacagtagca accctctatt gtgtgcatca aaggatagag ataaaagaca
1081  ccaaggaagc tttagacaag atagaggaa agcaaaaaca aagtaagacc accgcacagc
1141  aagcggccgg ccgctgatct tcagacctgg agggaggagat atgagggaca attggagagg
1201  tgaattatat aatataaag tagtaaaaat tgaaccatta ggagtgcac ccaccaaggg
1261  aaagagaaga gtggtgcaga gaaaaaaaag agcagtgga ataggagctt tgttcttggg
1321  gttcttggga gcagcaggaa gcactatggg cgcagcgtca atgacgctga cgttacaggg
1381  cagacaatta ttgtctgcta tagtgcagca gcagaacaat ttgctgaggg ctattgaggc
1441  gcaacagcat ctgttgaac tcacagtctg gggcatcaag cagctccagg caagaatcct
1501  ggctgtggaa agatcaccaa aggatcaaca gctcctgggg atttgggggt gctctggaaa
1561  actcatttgc accactgctg tgccctggaa tgctagtgg agtaataaat ctctggaaca
1621  gatttggaat cacacgacct ggatggagtg ggacagagaa ataaacaat acacaagctt
1681  aatacactcc ttaattgaag aatcgcaaaa ccagcaagaa aagaatgaac aagaattatt
1741  ggaattagat aaatgggcaa gtttgggaa ttggttaac ataaacaat ggctgtgcta

```



1801 tataaaatta ttcaaatga tagtaggagg cttgtaggt ttaagaatg tttttctgt  
1861 actttctata gtgaatagag ttaggcaggg atattcacca ttatcgttc agaccacct  
1921 cccaacccc aggggacccg acaggcccca aggaatagaa gaagaagtg gagagagaga  
1981 cagagacaga tccattcgat tagtgaacgg atctcgacgg tatcgccttt aaaagaaaag  
2041 gggggattgg ggggtacagt gcaggggaaa gaatagtaga cataatagca acagacatac  
2101 aaactaaaga actacaaaa caaattacaa aaattacaaa ttttcgggtt tattacaggg  
2161 acagcagaga tccagtttat cgatgagggc ctttcgtctt cactogagGA TCTGGCCTCC  
2221 GCGCCGGGTT TTGGCGCCTC CCGCGGGGCG CCCCTCCTC ACGGCGAGCG CTGCCACGTC  
2281 AGACGAAGGG CGCAGCGAGC GTCCTGATCC TTCCGCCCGG ACGCTCAGGA CAGCGGCCCC  
2341 CTGCTCATAA GACTCGGCCT TAGAACCCCA GTATCAGCAG AAGGACATTT TAGGACGGGA  
2401 CTTGGGTGAC TCTAGGGCAC TGGTTTTCTT TCCAGAGAGC GGAACAGGCG AGGAAAAAGTA  
2461 GTCCCTTCTC GCGGATTCTG CGGAGGGATC TCCGTGGGGC GGTGAACGCC GATGATTATA  
2521 TAAGGACGCG CCGGGTGTGG CACAGCTAGT TCCGTGCGAG CCGGGATTG GGTGCGGGTT  
2581 CTGTTTTGTG GATCGCTGTG ATCGTCACTT GGTGAGTAGC GGGCTGCTGG GCTGGCCGGG  
2641 GCTTTCGTGG CCGCCGGGCC GCTCGGTGGG ACGGAAGCGT GTGGAGAGAC CGCAAGGGC  
2701 TGTAGTCTGG GTCGCGGAGC AAGTTGCC TGAAC TGGGG GTTGGGGGGA GCGCAGCAAA  
2761 ATGGCGGCTG TTCCCGAGTC TTGAATGGAA GACGCTTGTG AGGCGGGCTG TGAGGTGCTT  
2821 GAAACAAGGT GGGGGGCATG GTGGGCGGCA AGAACCCAAG GTCTTGAGGC CTTCGCTAAT  
2881 GCGGGAAAAG TCTTATTCGG GTGAGATGGG CTGGGGCACC ATCTGGGGAC CCTGACGTGA  
2941 AGTTTGTAC TGACTGGAGA ACTCGGTTT GTCGTCTGGT TCGGGGGCG GCAGTTATGC  
3001 GGTGCGTTG GACTGTGAC CCGTACCTTT GGGAGCGCGC GCCTCGTCTG TCGGTGACGT  
3061 CACCCGTTCT GTTGGCTTAT AATGCAGGGT GGGGCCACCT GCCGGTAGGT GTGCGGTAGG  
3121 CTTTTCTCCG TCGCAGGACG CAGGGTTCGG GCCTAGGGTA GGCTCTCTG AATCGACAGG  
3181 CGCCGGACCT CTGGTGAAGG GAGGGATAAG TGAGGCGTCA GTTCTTTTGG TCGGTTTTAT  
3241 GTACCTATCT TCTTAAGTAG CTGAAGCTCC GGTTTTGAAC TATGCGCTCG GGGTTGGCGA  
3301 GTGTGTTTTG TGAAGTTTTT TAGGCACCTT TTGAAATGTA ATCATTGGG TCAATATGTA  
3361 ATTTTCAGTG TTAGACTAGT AAATTGTCG CTAATTCCTG GCCGTTTTG GCTTTTTTGT  
3421 TAGACGAAGC TTGGGCTGCA GGTGAGGCTC AAGCTTCGAA TTCTGCAGTC GACGGTACCG  
3481 CCGGCCGGG ATCCACCGGT CGCCACCATT GGCCTCAAAA AGAAAAGAAA AGTTGGTACT  
3541 CCCTACGACG TGCCCGACTA CGCCATCGAA GGCCGCCATA TGCTAGCCTC CAAAACCATC  
3601 GTTCTTTCGG TCGGCGAGGC TACTCGCACT CTGACTGAGA TCCAGTCCAC CGCAGACCGT  
3661 CAGATCTTCG AAGAGAAGGT CCGGCCTCTG GTGGGTGCGC TGCGCCTCAC GGCTTCGCTC  
3721 GTCAAAAACG GACCAAGAC CGCGTATCGC GTCACCTAA AACTGGATCA GCGCAGCTC  
3781 GTTGATTCCG GACTTCCGAA AGTGCCTAC ACTCAGGTAT GGTGCGCAGA CGTGACAATC  
3841 GTTGCGAATA GCACCGAGGC CTCGCGCAAA TCGTTGTACG ATTTGACCAA GTCCTCGTC  
3901 GGCACCTCGC AGGTGCAAGA TCTGTGCTC AACCTTGTGC CGCTGGGCGG TCCACCGGTC  
3961 GCCACCATGG TGTCTAAGGG CGAAGAGCTG ATTAAGGAGA ACATGCACAT GAAGCTGTAC  
4021 ATGGAGGGCA CCGTGAACAA CCACCACTC AAGTGCACAT CCGAGGGCGA AGGCAAGCCC  
4081 TACGAGGGCA CCCAGACCAT GAGAATCAAG GTGGTCGAGG GCGGCCCTCT CCCCTTCGCC  
4141 TTCGACATCC TGGCTACCAG CTTCATGTAC GGCAGCAGAA CCTTCATCAA CCACACCCAG  
4201 GGCATCCCCG ACTTCTTTAA GCAGTCCTC CCTGAGGGCT TCACATGGGA GAGAGTCACC  
4261 ACATACGAAG ACGGGGGCGT GCTGACCGCT ACCCAGGACA CCAGCCTCCA GGACGGCTGC  
4321 CTCATCTACA ACGTCAAGAT CAGAGGGGTG AACTTCCAT CCAACGGCCC TGTGATGCAG  
4381 AAGAAAACAC TCGGCTGGGA GGCCAACACC GAGATGCTGT ACCCCGCTGA CGGCGGCTG  
4441 GAAGGCAGAA GCGACATGGC CCTGAAGCTC GTGGGGCGGG GCCACCTGAT CTGCAACTTC  
4501 AAGACCAGAT AAGACCTCAA GAAACCGCT AAGAACCTCA AGATGCCCGG CGTCTACTAT  
4561 GTGGACCACA GACTGGAAG AATCAAGGAG GCCGACAAA AGACCTACGT CGAGCAGCAC  
4621 GAGGTGGCTG TGGCCAGATA CTGCGACCTC CCTAGCAAAC TGGGGCACAA ACTTAATTAC  
4681 AAGTAAtaa TAGTAATCAA TTACGGGgaa ttctaccggg taggggagc gcttttccca  
4741 aggcagctg gagcatgccc tttagcagcc cgcctgggca cttgcegeta cacaagtgc  
4801 ctctggcctc gcacacatc cacatccacc gtaggcgccc aaccggctcc gttcttggg  
4861 ggcctctcg cgcacatc tactctccc ctatcagga agtcccccc cgcctccag  
4921 ctgcgctgt gcaggacgtg acaaatggaa gtagcacgtc tcaactgtc cgtgcagatg  
4981 gacagcaccg ctgagcaatg gaagcgggta ggccttggg gcagcggcca atagcagctt  
5041 tgctccttg cttctgggc tcagaggctg ggaaggggtg ggtccggggg cgggctcagg  
5101 ggcgggctca ggggcggggc gggcgcccga aggtctccg gaggccggc attctgcagc  
5161 ttcaaaagc gcagctctc cgcgctgtt tctcttct catctccgg cttctgacc  
5221 tgacgcccga gcttaccatg accgagtaca agcccaggt gcgctcggc acccgcgagc  
5281 acgtccccag ggcctgacg accctcggc cgcgctcgc cgaactacc gcacgcgcc  
5341 acaccgtgca tccggaccgc cacatcgagc ggtcaccga gctgcaaga ctctctca  
5401 cgcgctcgg gctcgacatc gcaaggtgt ggtcgcgga cgacggcgcc gcggtggcgg  
5461 tctgaccac gccgagagc gtcgaagcgg ggcgctgtt cgcgagatc gggcccgca  
5521 tggccgagtt gacgggttc cggctggcg cgcagcaaa gatggaagc ctctggcgc  
5581 gcacccgccc caaggagccc gctggttcc tggccaccgt cggcgtctc cccgaccac  
5641 agggcaaggg tctggcagc gccgtcgtc tccccggagt ggagcggcc gagcgcggc  
5701 ggtgcccgc cttctggag acctccgcg cccgcaact ccccttacc gagcggctc  
5761 gcttaccgt caccgccac gtcgaggtc ccgaagacc gcgcacctg tcatgacc  
5821 gcaagcccg tgcctgacg ggcgctctg gaacaatca cctctgatt acaaaattg  
5881 tgaagattg actggtatc ttaactatg tctctctt acgctatg gatacgtc  
5941 ttaatgctc ttgatcatg ctattgctc ccgatgctc ttatttct cctcttga

6001 taaactctgg ttgctgtctc ttatgagga gttgtgccc gttgtcaggc aacgtggcgt  
6061 ggtgtgcact gttgttctg acgcaacccc cactgttgg ggcatggcca ccactgtca  
6121 gctcctttcc gggacttctg ctttccccct cctattgcc acggcggaaac tcatgcccgc  
6181 ctgccttgcc cgctgctgga caggggctcg gctgttgggc actgacaatt ccgtgggtt  
6241 gtcggggaag ctgacgtctc ttccatggct gctcgcctgt gttgccacct ggaltctg  
6301 cgggacgtcc ttctgtacg tccttcggc cctcaatcca gcggacctc cttcccgg  
6361 cctgtgccc gctctgggc ctctccgcg tcttcgctt cgcctcaga cgagtggat  
6421 ctcccctgg gccgcctccc cgcttgaat taattctgca gtcgagacct agaaaaacat  
6481 ggagcaatca caagtagcaa tacagcagct accaatgctg attgtcctg gctagaagca  
6541 caagaggagg aggaggtggg ttttccagt cacacctcag gtaccttaa gaccaatgac  
6601 ttacaaggca gctgtagatc ttaccactt ttaaaagaa aagaggggac tggaaaggct  
6661 aattcactcc caacgaagac aagatatct tgaatctgg atctaccaca cacaaggcta  
6721 ctcccctgat tagcagaact acacaccagg gccaggggct agatattcc tgacctttg  
6781 atgggtctac aagctagtac cagttgagcc agataaggta gaagaggcca ataaaggaga  
6841 gaacaccagc ttgttacacc ctgtgagcct gcattgggat gatgaccgg agagagaagt  
6901 tttagagtg aggtttgaca gccgcctagc attcatcac gtggcccag agctgcatcc  
6961 ggagtaactc aagaactgct gatacagc ctgtacaag ggactttcc ctgggactt  
7021 tccaggaggc cgtggcctgg gcgggactgg ggagtggcga gccctcagat cctgcatata  
7081 agcagctgct tttgctgt actgggtctc tctgttaga ccagatctga gctggggagc  
7141 tctctggcta actagggaac cactgtctta agcctcaata aagcttgcct tgaagtctc  
7201 aagtagtgtg tgcccgtctg ttgtgtgact ctgtaacta gagatcccct agacctttt  
7261 agtcagtggt gaaaatctct agcagtagta gttcatgca tcttattatt cagtattat  
7321 aacttgcaaa gaaatgaata tcagagagtg agaggccttg acattgctag cgttttaccg  
7381 tcgacctcta gctagagctt ggctaatca tggctatagc tgttctctgt gtgaaattg  
7441 tatccctca caattccaca caacatagc gccggagca taaagttaa agcctggggt  
7501 gcctaagtag tgaactaac cacattaatt gctgtgct cactcccgc ttccagtcg  
7561 ggaacacctg cgtgccagct gcattaatga atcgccaac gcgcggggag agcggtttg  
7621 cgtattgggc gctctccg ttctcctc actgactcgc tgcgctcgt cgttcggctg  
7681 cggcagcggc taccagctca ctcaaaaggc gtaatacggc tatccacaga atcaggggat  
7741 aacgcaggaa agaactatg agcaaaaagg cagcaaaaagg ccaggaaacc taaaaaggcc  
7801 gcgttctgg cgttttcca taggtccgc cccctgacg agcatcaca aaatgcagc  
7861 tcaagtaca ggtggcgaaa cccgacaga ctataaagat accaggcgt tccccctgga  
7921 agctcccctg tgcctctcc tgttcgacc ctgcccctta ccgatacct gtcgcttt  
7981 ctcccctgg gaagcgtggc gctttctcat agctcagct taggtatct cagttcggg  
8041 tagtctgct gctccaagct gggtgtgtg cacgaacccc ccgttcagcc cgaccgtgc  
8101 gccttatccg gtaactatc tcttgagtc aaaccggtaa gacacgact atcgccactg  
8161 gcagcagcca ctgtaacag gattagcaga gcgaggtat taggcgggtc tacagagttc  
8221 ttgaagtgtt ggcttaacta cggctacact agaagaacag tatttggtat ctgctcctg  
8281 ctgaagccag ttacctcgg aaaaagagtt ggtagctctt gatccggcaa acaaacacc  
8341 gctgttagcg gttttttt ttgcaagcag cagattacg gcagaaaaaa aggatctcaa  
8401 gaagatcctt gtaactttc tacgggctc gacgctcag ggaacgaaaa ctacgttaa  
8461 gggattttg tcatgagatt atcaaaaagg atctcact agatcctttt aaattaaaa  
8521 tgaagtttta aatcaatca aagtatatat gagtaaaact ggtctgacag ttaccaatg  
8581 taatcagtg aggcacctat ctacgcgac tctctattc gttcatccat agtgcctga  
8641 ctcccctgct ttagataaac tacgatacgg gagggcttac catctgccc cagtgcctga  
8701 atgataccgc gagaccacg ctaccggct ccagatttat cagcaataaa ccagccagcc  
8761 ggaaggggcg agcgcagaag tggctctgca actttatccg cctccatcca gttcttaaat  
8821 tgttcccggg aagctagagt aagtagtgc ccagttaata gtttgcgcaa cgttgttgc  
8881 attgctacag gcatcgtggt gtcacgctc tcttttgga tggcttcaat cagctccggt  
8941 tcccaacgat caaggcagat tacatgaccc ccatgttgt gcaaaaaage ggttagctcc  
9001 ttccgtctc cgatcgtgt cagaagtaag ttggccgag tttatcaact catggttatg  
9061 gcagcactgc ataattctct tactgtcatg ccatccgtaa gatgctttc tgtactggt  
9121 gactactcaa ccaagtcatt ctgagaatag tgtatggcg gaccgagttg ctctgcccc  
9181 gcgtcaatac gggataatac cgcgccatc agcagaactt taaaagtgt catcattgga  
9241 aaacgttctt cggggcgaaa actctcaagg atcttaccgc tttgagatc cagttcgatg  
9301 taaccactc gtgcaccaa ctgatctca gcatcttta ctctaccag cgtttctggg  
9361 tgaacaaaa caggaaggca aatgccgca aaaaagggaa taaggcgag acggaaatg  
9421 tgaactacta tacttctct tttcaatat tattgaagca tttacaggg ttattgtctc  
9481 atgagccgat acataattga atgtattag aaaaataaac aaataggggt tccgagca  
9541 ttccccgaa aagtccacc tgacgtgac ggatcgggag atcaactgt ttattcagc  
9601 ttataatggt tacaataaaa gcaatagcat cacaaattc acaataaag cattttttc  
9661 actgcattc agttgtggt ttccaaact catcaatgta tcttatcatg tctgataca  
9721 ctgataaact caagctaacc aaaatcatcc caaactccc accccatacc ctattaccac  
9781 ttccaattac ctagtgttt catttactt aaacctgtga ttctctgaa ttattttac  
9841 tttaaagaaa ttgtattgt taaatagta ctcaaaact agtagttttt aaagaaatg  
9901 tattgttaa atatgtacta caaacttagt agt

//

## Sequence of psgRNA1.0-6xMS2-telo in GenBank format

LOCUS psgRNA1\_0\_6xMS2 4117 bp ds-DNA circular 02-JAN-2016  
DEFINITION pEYFP-N1  
ACCESSION  
KEYWORDS  
ORGANISM other sequences; artificial sequences; vectors.  
COMMENT  
COMMENT ApEinfo:methylated:1  
FEATURES Location/Qualifiers  
misc\_feature 259..783  
/label=sgRNA  
/ApEinfo\_fwdcolor=#ffff80  
/ApEinfo\_revcolor=green  
/ApEinfo\_graphicformat=arrow\_data {{0 1 2 0 0 -1}} {} 0  
width 5 offset 0  
misc\_feature 386..407  
/label=MS2SL  
/ApEinfo\_fwdcolor=#008000  
/ApEinfo\_revcolor=green  
/ApEinfo\_graphicformat=arrow\_data {{0 1 2 0 0 -1}} {} 0  
width 5 offset 0  
misc\_feature 456..477  
/label=MS2SL(1)  
/ApEinfo\_label=MS2SL  
/ApEinfo\_fwdcolor=#008000  
/ApEinfo\_revcolor=green  
/ApEinfo\_graphicformat=arrow\_data {{0 1 2 0 0 -1}} {} 0  
width 5 offset 0  
rep\_origin complement(1165..1471)  
/label=f1\_origin  
/ApEinfo\_fwdcolor=pink  
/ApEinfo\_revcolor=pink  
/ApEinfo\_graphicformat=arrow\_data {{0 1 2 0 0 -1}} {} 0  
width 5 offset 0  
misc\_feature 666..687  
/label=MS2SL(2)  
/ApEinfo\_label=MS2SL  
/ApEinfo\_fwdcolor=#008000  
/ApEinfo\_revcolor=green  
/ApEinfo\_graphicformat=arrow\_data {{0 1 2 0 0 -1}} {} 0  
width 5 offset 0  
promoter 1550..1578  
/label=AmpR\_promoter  
/ApEinfo\_fwdcolor=pink  
/ApEinfo\_revcolor=pink  
/ApEinfo\_graphicformat=arrow\_data {{0 1 2 0 0 -1}} {} 0  
width 5 offset 0  
misc\_feature 596..617  
/label=MS2SL(3)  
/ApEinfo\_label=MS2SL  
/ApEinfo\_fwdcolor=#008000  
/ApEinfo\_revcolor=green  
/ApEinfo\_graphicformat=arrow\_data {{0 1 2 0 0 -1}} {} 0  
width 5 offset 0  
misc\_feature complement(1650..1865)  
/label=SV40\_enhancer  
/ApEinfo\_fwdcolor=pink  
/ApEinfo\_revcolor=pink  
/ApEinfo\_graphicformat=arrow\_data {{0 1 2 0 0 -1}} {} 0  
width 5 offset 0  
promoter 10..258  
/dnas\_title="Human U6 Promoter"  
/vntifkey="29"  
/label=Human U6 Promoter  
/ApEinfo\_fwdcolor=pink  
/ApEinfo\_revcolor=pink  
/ApEinfo\_graphicformat=arrow\_data {{0 1 2 0 0 -1}} {} 0  
width 5 offset 0

promoter 1662..1930  
 /label=SV40\_promoter  
 /ApEinfo\_fwdcolor=pink  
 /ApEinfo\_revcolor=pink  
 /ApEinfo\_graphicformat=arrow\_data {{0 1 2 0 0 -1}} {} 0  
 width 5 offset 0

rep\_origin 1829..1906  
 /label=SV40\_origin  
 /ApEinfo\_fwdcolor=pink  
 /ApEinfo\_revcolor=pink  
 /ApEinfo\_graphicformat=arrow\_data {{0 1 2 0 0 -1}} {} 0  
 width 5 offset 0

CDS 2013..2807  
 /gene="NeoR/KanR"  
 /note="ORF frame 1"  
 /translation="MIEQDGLHAGSPAAWVERLFGYDWAQQTIGCSDAAVFRLSAQGR  
 PVLVFKTDLSGALNELQDEAARLSWLATTGVPCA AVL DVVTEAGRDWLLLGEVPGQDL  
 LSSH LAPAEKVSIMADAMRRLHTLDPATCFPDHQAKHRIERARTRMEAGLVDQDDLDE  
 EHQGLAPAE L FARLKASMPDGEDLVVTHGDA CLPNIMVENGRFSGFIDCGR LGVADRY  
 QDIALATRDIAEELGGEWADRFLVLYGIAAPDSQRIAFYRLLDEFF\*"

/label=NeoR/KanR  
 /ApEinfo\_fwdcolor=pink  
 /ApEinfo\_revcolor=pink  
 /ApEinfo\_graphicformat=arrow\_data {{0 1 2 0 0 -1}} {} 0  
 width 5 offset 0

terminator 2982..3251  
 /label=TK\_PA\_terminator  
 /ApEinfo\_fwdcolor=pink  
 /ApEinfo\_revcolor=pink  
 /ApEinfo\_graphicformat=arrow\_data {{0 1 2 0 0 -1}} {} 0  
 width 5 offset 0

rep\_origin 3399..4018  
 /label=pBR322\_origin  
 /ApEinfo\_fwdcolor=pink  
 /ApEinfo\_revcolor=pink  
 /ApEinfo\_graphicformat=arrow\_data {{0 1 2 0 0 -1}} {} 0  
 width 5 offset 0

misc\_feature 526..547  
 /label=MS2SL(4)  
 /ApEinfo\_label=MS2SL  
 /ApEinfo\_fwdcolor=#008000  
 /ApEinfo\_revcolor=green  
 /ApEinfo\_graphicformat=arrow\_data {{0 1 2 0 0 -1}} {} 0  
 width 5 offset 0

misc\_feature 736..757  
 /label=MS2SL(5)  
 /ApEinfo\_label=MS2SL  
 /ApEinfo\_fwdcolor=#008000  
 /ApEinfo\_revcolor=green  
 /ApEinfo\_graphicformat=arrow\_data {{0 1 2 0 0 -1}} {} 0  
 width 5 offset 0

misc\_feature 259..280  
 /label=Telomere target sequence  
 /ApEinfo\_fwdcolor=cyan  
 /ApEinfo\_revcolor=green  
 /ApEinfo\_graphicformat=arrow\_data {{0 1 2 0 0 -1}} {} 0  
 width 5 offset 0

ORIGIN

1 TAGTTATTAg agggcctatt tccatgatt ccttcatatt tgcatatagc atacaaggct  
 61 gttagagaga taattggaat taattgact gtaaacacaa agatattagt acaaaaatagc  
 121 tgacgtagaa agtaataatt tcttggtag ttgcagttt taaaattatg ttttaaatg  
 181 gactatcata tgctaccgt aactgaaag tatttcgatt tcttgcttt atatatcttG  
 241 TGGAAAGGAC GAAACACCGT TAGGGTTAGG GTTAGGGTTA gtttAagagc taTGCTGgaa  
 301 aCAGCAtagc aagttTaaat aaggctagtc cgttatcaac ttgaaaaagt ggcaccgagt  
 361 cgggtcTCTG CAGGTCGACT CTAGAAAACA TGAGGATCAC CCATGTCTGC AGTATTCCCG  
 421 GGTTCATTAG ATCCTAAGGT ACCTAATTGC CTAGAAAACA TGAGGATCAC CCATGTCCGA  
 481 CACCGAACGT GCGACAAAAGC TAAGTGCGCC GTACGGAGAT CCGATAAACA TGAGGATCAC  
 541 CCATGTCTT GCGAGATTAC GCGGCACATT ATTGGTCGAC GCCGCGAGCT ATCGTAAACA  
 601 TGAGGATCAC CCATGTCTCT GTTTGACGCG CTGGACGCC ATGATCGTCC GATCTGGCCC  
 661 GCGTTAAACA TGAGGATCAC CCATGTCTCT CCGCGGCTTG AAACCATACA CCGAACGAGA

721 CGGTCAATCG CGCAGAAACA TGAGGATCAC CCATGTCGGA CCGAGGGCTC TAGAAATTT  
781 TTTGCGGCCG CGACTCTAGA TCATAATCAG CCATACCACA TTTGTAGAGG TTTTACTTGC  
841 TTTAAAAAC CCTCCACACC TCCCCTGAA CCGTAAACAT AAAATGAATG CAATTGTTGT  
901 TGTTAACTTG TTTATTGCAG CTTATAATGG TTACAAATAA AGCAATAGCA TCACAAATTT  
961 CACAAATAAA GCATTTTTTT CACTGCATTC TAGTTGTGGT TTGTCCAAAC TCATCAATGT  
1021 ATCTTAAGGC GTAAATTGTA AGCGTTAATA TTTTGTTAAA ATTCGCGTTA AATTTTTGTT  
1081 AAATCAGCTC ATTTTTTAAC CAATAGGCCG AAATCGGCAA AATCCCTTAT AAATCAAAG  
1141 AATAGACCGA GATAGGGTTG AGTGGTATTC CAGTTTGAA CAAGAGTCCA CTATTAAGA  
1201 ACGTGGACTC CAACGTCAA GGGCGAAAA CCGTCTATCA GGGCGATGGC CCACTACGTG  
1261 AACCATCACC CTAATCAAGT TTTTGGGGT CGAGGTGCCG TAAAGCACTA AATCGGAACC  
1321 CTAAGGGGAG CCCCCGATTT AGAGCTTGAC GGGGAAAGCC GGCGAACGTG GCGAGAAAGG  
1381 AAGGGAAGAA AGCGAAAGGA GCGGGCGCTA GGGCGCTGTC AAGTGTAGCG GTCACGCTGC  
1441 GCGTAACCAC CACACCCGCC GCGCTTAATG CGCCGCTACA GGGCGCGTCA GGTGGCACTT  
1501 TTCGGGGAAA TGTGCGCGGA ACCCCTATTT GTTATTTTT TAAATACAT TCAAATATGT  
1561 ATCCGCTCAT GAGACAATA CCCTGATAAA TGCTCAATA ATATTGAAA AGGAAGAGTC  
1621 CTGAGCCGA AAGAACCAGC GTGGAATGT GTGTCAGTTA GGGTGTGGAA AGTCCCAGG  
1681 CTCCCAGCA GGCAGAAGTA TGCAAAGCAT GCATCTCAAT TAGTCAGCAA CCAGGTGTGG  
1741 AAAGTCCCA GGCTCCCAG CAGGCAGAAG TATGCAAAGC ATGCATCTCA ATTAGTCAGC  
1801 AACCATAGTC CCGCCCCTA CTCCGCCAT CCGCCCCA ACTCCGCCA GTTCCGCCA  
1861 TTCTCCGCC CATGGCTGAC TAATTTTTT TATTTATGCA GAGGCCGAGG CCGCCTCGG  
1921 CTCTGAGTA GACAGGATGA GGATCGTTTC GCATGATTGA ACAAGATGGA TTGCACGCA  
1981 TCGATCAAGA GACAGGATGA GGATCGTTTC GCATGATTGA ACAAGATGGA TTGCACGCA  
2041 GTTCTCCGGC CGCTTGGGTG GAGAGGCTAT TCGCTATGA CTGGGCACAA CAGACAATCG  
2101 GCTGCTCTGA TGCCGCCGTG TTCCGGCTGT CAGCGCAGGG GCGCCCGGTT CTTTTGTCA  
2161 AGACCGACCT GTCCGGTGCC CTGAATGAAC TGCAAGACGA GGCAGCGCGG CTATCGTGGC  
2221 TGGCCACGAC GGGCGTTCCT TGCGCAGCTG TGCTCGACGT TGCTACTGAA GCGGGAAGGG  
2281 ACTGGCTGCT ATTTGGCGAA GTGCCGGGGC AGGATCTCCT GTCATCTCAC CTGCTCCTG  
2341 CCGAGAAAGT ATCCATCATG GCTGATGCAA TGCGGCGGCT GCATACGCTT GATCCGGCTA  
2401 CCTGCCCAT CGACCACCAA GCGAAACATC GCATCGAGCG AGCACGTACT CGGATGGAAG  
2461 CCGGTCTTGT CGATCAGGAT GATCTGGACG AAGAGCATCA GGGGCTCGCG CCAGCCGAAC  
2521 TGTCGCCAG GCTCAAGGCG AGCATGCCCG ACGGCGAGGA TCTCGTCGTG ACCCATGGCG  
2581 ATGCCTGCTT GCCGAATATC ATGGTGGAAA ATGGCCGCTT TTCTGGATT CAGACTGTG  
2641 GCCGGCTGGG TGTGGGTCG TTGTTTCATA ACGCGGGGTT CGGTCCAGG GCTGGCACTC  
2701 AAGAGCTTGG GCGCGAATGG GCTGACCGCT TCCTCGTGT TTACGGTATC GCCGCTCCCG  
2761 ATTCGACGCG CATCGCCTT TATCGCCTT TTAGCAGATT CTCTGAGCG GACTCTGGG  
2821 GTTCGAAAT ACCGACCAAG CGACGCCCAA CCTGCCATCA CGAGATTTTC ATTCCACCGC  
2881 CGCCTTCTAT GAAAGGTTGG GCTTCGGAAT CGTTTTCCGG GACGCCGGCT GGATGATCCT  
2941 CCAGCGCGGG GATCTCATGC TGGAGTTCTT CGCCACCCT AGGGGGAGGC TAACTGAAAC  
3001 ACGGAAGGAG ACAATACCGG AAGGAACCCG CGCTATGACG GCAATAAAAA GACAGAATAA  
3061 AACGCACGGT GTTGGGTCGT TTGTTTCATA ACGCGGGGTT CGGTCCAGG GCTGGCACTC  
3121 TGTCGATACC CCACCGAGAC CCCATTGGGG CCAATACGCC CGCGTTTCTT CTTTTCCCG  
3181 ACCCCACCCC CCAAGTTCCG GTGAAGGCC AGGGCTCGCA GCCAACGTCG GGGCGGCAGG  
3241 CCCTGCCATA GCCTCAGGTT ACTCATATAT ACTTTAGATT GATTTAAAAC TTCATTTTTA  
3301 ATTTAAAAGG ATCTAGGTGA AGATCCTTTT TGATAATCTC ATGACCAAAA TCCCTAACG  
3361 TGAGTTTTTC TTCCACTGAG CGTCAGACCC CGTAGAAAAG ATCAAAGGAT CTCTTGAGA  
3421 TCCTTTTTTT CTGCGCGTAA TCTGTGCTT GCAAACAAAA AAACCACCG TACCAGCGGT  
3481 GGTTTGTGTT CCGGATCAAG AGCTACCAAC TCTTTTTCCG AAGGTAAGTG GCTTCAGCAG  
3541 AGCGCAGATA CCAAATACTG TCCTTCTAGT GTAGCCGTAG TTAGGCCACC ACTTCAAGAA  
3601 CTCTGTAGCA CCGCTACAT ACCTCGCTCT GCTAATCCTG TTACCAGTGG CTGCTGCCAG  
3661 TGGCGATAAG TCGTGTCTTA CCGGTTGGA CTCAAGACGA TAGTTACCGG ATAAGGCGCA  
3721 GCGGTCGGGC TGAACGGGGG GTTCGTGCAC ACAGCCAGC TTGGAGCGAA CGACCTACAC  
3781 CGAACTGAGA TACCTACAGC GTGAGCTATG AGAAAGCGCC ACGCTCCCG AAGGGAGAAA  
3841 GCGGACAGG TATCCGGTAA GCGGCAGGGT CGGAACAGGA GAGCGCACGA GGGAGCTTC  
3901 AGGGGAAAC GCCTGGTATC TTTATAGTCC TGTCGGGTTT CGCCACCTCT GACTTGAGCG  
3961 TCGATTTTTG TGATGCTCGT CAGGGGGGCG GAGCCTATGG AAAAACGCCA GCAACGCGC  
4021 CTTTTTACGG TTCCTGGCCT TTTGCTGGCC TTTTGCTCAC ATGTTCTTTC CTGCGTTATC  
4081 CCCTGATTCT GTGGATAACC GTATTACCGC CATGCAT

//

## Sequence of psgRNA1.0-6xPP7-telo in GenBank format

LOCUS psgRNA1\_0\_6xPP7 4135 bp ds-DNA circular 02-JAN-2016  
DEFINITION pEYFP-N1  
ACCESSION  
KEYWORDS  
ORGANISM other sequences; artificial sequences; vectors.  
COMMENT  
COMMENT ApEinfo:methylated:1  
FEATURES Location/Qualifiers  
misc\_feature 259..801  
/label=sgRNA  
/ApEinfo\_fwdcolor=#ffff80  
/ApEinfo\_revcolor=green  
/ApEinfo\_graphicformat=arrow\_data {{0 1 2 0 0 -1}} {} 0  
width 5 offset 0  
misc\_feature 386..410  
/label=PP7  
/ApEinfo\_fwdcolor=cyan  
/ApEinfo\_revcolor=green  
/ApEinfo\_graphicformat=arrow\_data {{0 1 2 0 0 -1}} {} 0  
width 5 offset 0  
rep\_origin complement(1183..1489)  
/label=f1\_origin  
/ApEinfo\_fwdcolor=pink  
/ApEinfo\_revcolor=pink  
/ApEinfo\_graphicformat=arrow\_data {{0 1 2 0 0 -1}} {} 0  
width 5 offset 0  
misc\_feature 678..702  
/label=PP7(1)  
/ApEinfo\_label=PP7  
/ApEinfo\_fwdcolor=cyan  
/ApEinfo\_revcolor=green  
/ApEinfo\_graphicformat=arrow\_data {{0 1 2 0 0 -1}} {} 0  
width 5 offset 0  
promoter 1568..1596  
/label=AmpR\_promoter  
/ApEinfo\_fwdcolor=pink  
/ApEinfo\_revcolor=pink  
/ApEinfo\_graphicformat=arrow\_data {{0 1 2 0 0 -1}} {} 0  
width 5 offset 0  
misc\_feature 605..629  
/label=PP7(2)  
/ApEinfo\_label=PP7  
/ApEinfo\_fwdcolor=cyan  
/ApEinfo\_revcolor=green  
/ApEinfo\_graphicformat=arrow\_data {{0 1 2 0 0 -1}} {} 0  
width 5 offset 0  
misc\_feature 751..775  
/label=PP7(3)  
/ApEinfo\_label=PP7  
/ApEinfo\_fwdcolor=cyan  
/ApEinfo\_revcolor=green  
/ApEinfo\_graphicformat=arrow\_data {{0 1 2 0 0 -1}} {} 0  
width 5 offset 0  
misc\_feature complement(1668..1883)  
/label=SV40\_enhancer  
/ApEinfo\_fwdcolor=pink  
/ApEinfo\_revcolor=pink  
/ApEinfo\_graphicformat=arrow\_data {{0 1 2 0 0 -1}} {} 0  
width 5 offset 0  
promoter 10..258  
/dnas\_title="Human U6 Promoter"  
/vntifkey="29"  
/label=Human U6 Promoter  
/ApEinfo\_fwdcolor=pink  
/ApEinfo\_revcolor=pink  
/ApEinfo\_graphicformat=arrow\_data {{0 1 2 0 0 -1}} {} 0  
width 5 offset 0

promoter 1680..1948  
 /label=SV40\_promoter  
 /ApEinfo\_fwdcolor=pink  
 /ApEinfo\_revcolor=pink  
 /ApEinfo\_graphicformat=arrow\_data {{0 1 2 0 0 -1}} {} 0  
 width 5 offset 0  
 rep\_origin 1847..1924  
 /label=SV40\_origin  
 /ApEinfo\_fwdcolor=pink  
 /ApEinfo\_revcolor=pink  
 /ApEinfo\_graphicformat=arrow\_data {{0 1 2 0 0 -1}} {} 0  
 width 5 offset 0  
 CDS 2031..2825  
 /gene="NeoR/KanR"  
 /note="ORF frame 1"  
 /translation="MIEQDGLHAGSPAAWVERLFGYDWAQQTIGCSDAAVFRLSAQGR  
 PVLVFKTDLSGALNELQDEAARLSWLATTGVPCAALVLDVVTEAGRDWLLLGEVPGQDL  
 LSSHAPAEEKVSIMADAMRRLHTLDPATCFPDHQA KHRIERARTRMEAGLVDQDDLDE  
 EHQGLAPAELFARLKASMPDGEDLVVTHGDACLPNIMVENGRFSGFIDCGR LGVADRY  
 QDIALATRDIAEELGGEWADRFLVLYGIAAPDSQRIAFYRLLDEFF\*"  
 /label=NeoR/KanR  
 /ApEinfo\_fwdcolor=pink  
 /ApEinfo\_revcolor=pink  
 /ApEinfo\_graphicformat=arrow\_data {{0 1 2 0 0 -1}} {} 0  
 width 5 offset 0  
 terminator 3000..3269  
 /label=TK\_PA\_terminator  
 /ApEinfo\_fwdcolor=pink  
 /ApEinfo\_revcolor=pink  
 /ApEinfo\_graphicformat=arrow\_data {{0 1 2 0 0 -1}} {} 0  
 width 5 offset 0  
 rep\_origin 3417..4036  
 /label=pBR322\_origin  
 /ApEinfo\_fwdcolor=pink  
 /ApEinfo\_revcolor=pink  
 /ApEinfo\_graphicformat=arrow\_data {{0 1 2 0 0 -1}} {} 0  
 width 5 offset 0  
 misc\_feature 532..556  
 /label=PP7(4)  
 /ApEinfo\_label=PP7  
 /ApEinfo\_fwdcolor=cyan  
 /ApEinfo\_revcolor=green  
 /ApEinfo\_graphicformat=arrow\_data {{0 1 2 0 0 -1}} {} 0  
 width 5 offset 0  
 misc\_feature 459..483  
 /label=PP7(5)  
 /ApEinfo\_label=PP7  
 /ApEinfo\_fwdcolor=cyan  
 /ApEinfo\_revcolor=green  
 /ApEinfo\_graphicformat=arrow\_data {{0 1 2 0 0 -1}} {} 0  
 width 5 offset 0  
 misc\_feature 259..280  
 /label=Telomere target sequence  
 /ApEinfo\_fwdcolor=#008000  
 /ApEinfo\_revcolor=green  
 /ApEinfo\_graphicformat=arrow\_data {{0 1 2 0 0 -1}} {} 0  
 width 5 offset 0

ORIGIN

1 TAGTTATTAg agggcctatt tccatgatt ccttcattat tgcatatagc atacaaggct  
 61 gttagagaga taattggaat taattgact gtaaacacaa agatattagt acaaaatagc  
 121 tgacgtagaa agtaataatt tcttggtag tttgcagttt taaaattatg ttttaaatg  
 181 gactatcata tgctaccgt aactgaaag tatttcgatt tcttgcttt atatatcttG  
 241 TGGAAAGGAC GAAACACCGT TAGGGTTAGG GTTAGGGTTA gtttAagagc taTGCTGgaa  
 301 aCAGCAtagc aagttTaaat aaggctagtc cgttatcaac ttgaaaaagt ggcaccgagt  
 361 cgggtcTCTG CAGGTCGACT CTAGAGGAGC AGACGATATG GCGTCGCTCC TGCAGTATTC  
 421 CCGGGTTTAT TAGATCCTAA GGTACCTAAT TGCCTAGACC AGCAGAGCAT ATGGGCTCGC  
 481 TGGCGACACC GAACGTGCGA CAAAGCTAAG TGCGCCGTAC GGAGATCCGA TGGAGCAGAC  
 541 GATATGGCGT CGTCCCTTG CGAGATTACG CGGCACATTA TTGGTTCGACG CCGCGAGCTA  
 601 TCGTCCAGCA GAGCATATGG GCTCGCTGGT CTGTTTGACG CGCTGGACGC CCATGATCGT  
 661 CCGATCTGGC CCGCGTTGGA GCAGACGATA TGCGCTCGCT CCGCTCCGCG GCTTGAAC

721 ATACACCGAA CGAGACGGTC AATCGCGCAG CCAGCAGAGC ATATGGGCTC GCTGGGGACC  
781 GAGGGCTCTA GAAATTTTTT TGCGGCCGCT ACTCTAGATC ATAATCAGCC ATACCACATT  
841 TGTAGAGGT TTACTTGCTT TAAAAAACCT CCCACACCTC CCCCTGAACC TGAACATAA  
901 AATGAATGCA ATGTGTGTTG TTAACCTGTT TATTGCAGCT TATAATGGTT ACAAATAAAG  
961 CAATAGCATC ACAAATTTCA CAAATAAAGC ATTTTTTCA CTGCATTCTA GTTGTGGTTT  
1021 GTCCAAACTC ATCAATGTAT CTTAAGGCGT AAATTGTAAG CGTTAATATT TTGTTAAAT  
1081 TCGCGTAAA TTTTTGTAA ATCAGCTCAT TTTTAAACCA ATAGGCCGAA ATCGGCAAAA  
1141 TCCCTTATAA ATCAAAAAGAA TAGACCGAGA TAGGGTTGAG TGTGTTCCA GTTGGAACA  
1201 AGAGTCCACT ATTAAGAAGC GTGGACTCCA ACGTCAAAGG GCGAAAAACC GTCTATCAGG  
1261 GCGATGGCCC ACTACGTGAA CCATCACCTT AATCAAGTTT TTTGGGGTCG AGGTGCCGTA  
1321 AAGCACTAAA TCGGAACCTT AAAGGGAGCC CCCGATTTAG AGCTTGACGG GGAAGCCGG  
1381 CGAACGTGGC GAGAAAAGAA GGAAGAAAAG CGAAAGGAGC GGGCGTAGG GCGCTGGCAA  
1441 GTGTAGCGGT CACGCTGCGC GTAACCACCA CACCCGCCGC GCTTAATGCG CCGCTACAGG  
1501 GCGCGTCAGG TGGCACTTTT CGGGGAAATG TGCGCGAAC CCTATTTGT TTATTTTCT  
1561 AAATACATTC AAATATGTAT CCGCTCATGA GACAATAACC CTGATAAATG TTCAATAAT  
1621 ATTGAAAAAG GAAGATCCTT GAGGCGAAA GAACCACTG TGGAATGTGT GTCAGTTAGG  
1681 GTGTGAAAAG TCCCCAGGCT CCCAGCAGG CAGAAGTATG CAAAGCATGC ATCTCAATTA  
1741 GTCAGCAACC AGGTGTGGAA AGTCCCAGG CTCCCAGCA GGCAGAAGTA TGCAAAGCAT  
1801 GCATCTCAAT TAGTCAGCAA CCATAGTCCC GCCCCTAACT CCGCCATCC CGCCCCTAAC  
1861 TCCGCCAGT TCCGCCATT CTCGCCCA TGGCTGACTA ATTTTTTTA TTTATGCAGA  
1921 GCGCGAGCC GCGCTGGCCT CTGAGATT CCAGAAGTAG TGAGGAGGT TTTTGGAGG  
1981 CCTAGGCTTT TGCAAAGATC GATCAAGAGA CAGGATGAGG ATCGTTTCGC ATGATTGAAC  
2041 AAGATGGATT GCACGCAGGT TCTCCGGCCG CTGGGTGGA GAGGCTATTC GGCTATGACT  
2101 GGGCACAACA GACAATCGGC TGCTCTGATG CCGCCGTGTT CCGGCTGCA GCGCAGGGG  
2161 GCCCGGTTCT TTTGTCAAAG ACCGACCTGT CCGGTGCCCT GAATGAACTG CAAGACGAGG  
2221 CAGCGCGGCT ATCGTGGCTG GCCACGACGG GCGTTCCTTG CGCAGCTGTG CTCGACGTTG  
2281 TCACTGAAGC GGAAGGGAC TGGCTGCTAT TGGGCAAGT GCCGGGCGAG GATCTCCTGT  
2341 CATCTACCTT TGCTCCTGCC GAGAAAGTAT CCATCATGGC TGATGCAATG CGGCGGCTGC  
2401 ATACGGTTGA TCCGGCTACC TGCCATTCC ACCACCAAGC GAAACATCGC ATCGAGCGAG  
2461 CACGTAATCG GATGGAAGCC GGTCTTGTGC ATCAGGATGA TCTGGACGAA GAGCATCAGG  
2521 GGCTCGCGCC AGCCGAACG TTCGCCAGG TCAAGCGAG CATGCCCGAC GGCGAGGATC  
2581 TCGTCGTGAC CCATGGCGAT GCCTGCTTGC CGAATATCAT GGTGGAAAAAT GGCCGCTTTT  
2641 CTGGATTGAT GACTGTGGC CGGTGGGTG TGGCGGACCG CTATCAGGAC ATAGCGTTGG  
2701 CTACCCGTTA TATTGCTGAA GAGCTTGGCG GCGAATGGGC TGACCGCTC CTGCTGCTT  
2761 ACGTATCGC CGCTCCGAT TCGCAGCGCA TCGCTTCTA TCGCTTCTT GACGAGTTCT  
2821 TCTGAGCGGG ACTCTGGGGT TCGAAATGAC CGACCAAGCG ACGCCCAACC TGCCATCAGC  
2881 AGATTTCTG TCCACCGCC CTTCTATGA AAGGTTGGC TTCGGAATCG TTTCCGGGA  
2941 GCCCGGTTG ATGATCCTCC AGCGGGGGA TCTCATGCTG GAGTTCTTCG CCCACCCTAG  
3001 GGGGAGGCTA ACTGAAACAC GGAAGGAGC AATACCGAA GGAACCCGCG CTATGACGGC  
3061 AATAAAAAAG CAGAATAAAA CGCACGGTGT TGGGTCGTTT GTTCATAAAC GCGGGGTTCC  
3121 GTCCAGGGC TGGCACTCTG TCGATACCCC ACCGAGACCC CATTGGGGCC AATACGCCCC  
3181 CGTTTCTCC TTTTCCAC CCCACCCCC AAGTTCGGGT GAAGGCCAG GGCTCGCAGC  
3241 CAACGTCGGG GCGGCAGGCC CTGCCATAGC CTCAGGTTAC TCATATATAC TTTAGATTGA  
3301 TTTAAACTT CATTTTTAAT TAAAAGGAT CTAGGTGAAG ATCCTTTTGT ATAATCTCAT  
3361 GACCAAAATC CCTAACGTG AGTTTTCTT CACTGAGCG TCAGACCCCG TAGAAAAGAT  
3421 CAAAGGATCT TCTTGAGATC CTTTTTTCT GCGCGTAA TCAGGCTTGC AAACAAAAA  
3481 ACCACCGTA CCAGCGGTGG TTTGTTGCC GGATCAAGAG CTACCAACTC TTTTCCGAA  
3541 GGTAACGGC TTCAGCAGAG CGCAGATACC AAATACTGTC CTCTAGTGT AGCCGTAGTT  
3601 AGGCCACCAC TTCAAGAACT CTGTAGCACC GCCTACATAC CTCGCTCTG TAATCCTGTT  
3661 ACCAGTGGCT GCTGCCAGT GCGATAAGTC GTGTCTTACC GGGTTGGACT CAAGACGATA  
3721 GTTACCGGAT AAGGCGCAGC GGTCCGGGT AACGGGGGT TCGTGCACAC AGCCAGCTT  
3781 GGAGCGAAG ACCTACACCG AACTGAGATA CCTACAGCGT GAGCTATGAG AAAGCGCCAC  
3841 GCTTCCCGAA GGGAGAAAG CGGACAGGTA TCCGGTAAGC GGCAGGGTCG GAACAGGAGA  
3901 GCGCAGGAG GAGCTTCCAG GGGGAAACGC CTGGTATCTT TATAGTCCTG TCGGGTTTCG  
3961 CCACCTCTGA CTTGAGCGTC GATTTTGTG ATGCTCGTCA GGGGGCGGA GCCTATGGAA  
4021 AAACGCCAGC AACGCGGCT TTTTACGGTT CTTGGCCTTT TGCTGGCCTT TTGCTACAT  
4081 GTTCTTCTC GGTATCTCC CTGATTCTGT GGATAACCGT ATTACCGCA TGCAT

//



## Sequence of psgRNA2.0-6xMS2-telo in GenBank format

LOCUS psgRNA2\_0\_6xMS2 4027 bp ds-DNA circular 02-JAN-2016  
DEFINITION pEYFP-N1  
ACCESSION  
KEYWORDS  
ORGANISM other sequences; artificial sequences; vectors.  
COMMENT  
COMMENT ApEinfo:methylated:1  
FEATURES Location/Qualifiers  
misc\_feature 259..693  
/label=sgRNA  
/ApEinfo\_fwdcolor=#ffff80  
/ApEinfo\_revcolor=green  
/ApEinfo\_graphicformat=arrow\_data {{0 1 2 0 0 -1}} {} 0  
width 5 offset 0  
misc\_feature 436..457  
/label=MS2SL  
/ApEinfo\_fwdcolor=#008000  
/ApEinfo\_revcolor=green  
/ApEinfo\_graphicformat=arrow\_data {{0 1 2 0 0 -1}} {} 0  
width 5 offset 0  
misc\_feature 506..527  
/label=MS2SL(1)  
/ApEinfo\_label=MS2SL  
/ApEinfo\_fwdcolor=#008000  
/ApEinfo\_revcolor=green  
/ApEinfo\_graphicformat=arrow\_data {{0 1 2 0 0 -1}} {} 0  
width 5 offset 0  
rep\_origin complement(1075..1381)  
/label=f1\_origin  
/ApEinfo\_fwdcolor=pink  
/ApEinfo\_revcolor=pink  
/ApEinfo\_graphicformat=arrow\_data {{0 1 2 0 0 -1}} {} 0  
width 5 offset 0  
promoter 1460..1488  
/label=AmpR\_promoter  
/ApEinfo\_fwdcolor=pink  
/ApEinfo\_revcolor=pink  
/ApEinfo\_graphicformat=arrow\_data {{0 1 2 0 0 -1}} {} 0  
width 5 offset 0  
misc\_feature 646..667  
/label=MS2SL(2)  
/ApEinfo\_label=MS2SL  
/ApEinfo\_fwdcolor=#008000  
/ApEinfo\_revcolor=green  
/ApEinfo\_graphicformat=arrow\_data {{0 1 2 0 0 -1}} {} 0  
width 5 offset 0  
misc\_feature complement(1560..1775)  
/label=SV40\_enhancer  
/ApEinfo\_fwdcolor=pink  
/ApEinfo\_revcolor=pink  
/ApEinfo\_graphicformat=arrow\_data {{0 1 2 0 0 -1}} {} 0  
width 5 offset 0  
promoter 10..258  
/dnas\_title="Human U6 Promoter"  
/vntifkey="29"  
/label=Human U6 Promoter  
/ApEinfo\_fwdcolor=pink  
/ApEinfo\_revcolor=pink  
/ApEinfo\_graphicformat=arrow\_data {{0 1 2 0 0 -1}} {} 0  
width 5 offset 0  
promoter 1572..1840  
/label=SV40\_promoter  
/ApEinfo\_fwdcolor=pink  
/ApEinfo\_revcolor=pink  
/ApEinfo\_graphicformat=arrow\_data {{0 1 2 0 0 -1}} {} 0  
width 5 offset 0  
rep\_origin 1739..1816

```

/label=SV40_origin
/ApEinfo_fwdcolor=pink
/ApEinfo_revcolor=pink
/ApEinfo_graphicformat=arrow_data {{0 1 2 0 0 -1}} {} 0
width 5 offset 0
CDS      1923..2717
/label=NeoR/KanR
/translation="MIEQDGLHAGSPAAWVERLFGYDWAQQTIGCSDAAVFRLSAQGR
PVLVFKTDLGALNELQDEAARLSWLATTGVPCAAVLDVVTEAGRDWLLLGEVPGQDL
LSSHLAPAEEKVSIMADAMRRLHTLDPATCPFHDQAKHRIERARTRMEAGLVDQDDLDE
EHQGLAPAELFARLKASMPDGEDLVVTHGDACLPNIMVENGRFSGFIDCGRLGVADRY
QDIALATRDIAEELGGEWADRFLVLYGIAAPDSQRIAFYRLLDEFF*"
/label=NeoR/KanR
/ApEinfo_fwdcolor=pink
/ApEinfo_revcolor=pink
/ApEinfo_graphicformat=arrow_data {{0 1 2 0 0 -1}} {} 0
width 5 offset 0
terminator 2892..3161
/label=TK_PA_terminator
/ApEinfo_fwdcolor=pink
/ApEinfo_revcolor=pink
/ApEinfo_graphicformat=arrow_data {{0 1 2 0 0 -1}} {} 0
width 5 offset 0
rep_origin 3309..3928
/label=pBR322_origin
/ApEinfo_fwdcolor=pink
/ApEinfo_revcolor=pink
/ApEinfo_graphicformat=arrow_data {{0 1 2 0 0 -1}} {} 0
width 5 offset 0
misc_feature 576..597
/label=MS2SL(3)
/ApEinfo_label=MS2SL
/ApEinfo_fwdcolor=#008000
/ApEinfo_revcolor=green
/ApEinfo_graphicformat=arrow_data {{0 1 2 0 0 -1}} {} 0
width 5 offset 0
misc_feature 293..326
/label=MS2SL(4)
/ApEinfo_label=MS2SL
/ApEinfo_fwdcolor=#008000
/ApEinfo_revcolor=green
/ApEinfo_graphicformat=arrow_data {{0 1 2 0 0 -1}} {} 0
width 5 offset 0
misc_feature 363..396
/label=MS2SL(5)
/ApEinfo_label=MS2SL
/ApEinfo_fwdcolor=#008000
/ApEinfo_revcolor=green
/ApEinfo_graphicformat=arrow_data {{0 1 2 0 0 -1}} {} 0
width 5 offset 0
misc_feature 259..280
/label=Telomere target sequence
/ApEinfo_fwdcolor=cyan
/ApEinfo_revcolor=green
/ApEinfo_graphicformat=arrow_data {{0 1 2 0 0 -1}} {} 0
width 5 offset 0

```

ORIGIN

```

1 TAGTTATTAg agggcctatt tccatgatt ccttcattat tgcatatagc atacaaggct
61 gtagagaga taattggaat taattgact gtaaacacaa agatattagt acaaaatagc
121 tgacgtagaa agtaataatt tcttggtag ttgcagttt taaaattatg ttttaaatg
181 gactatcata tgctaccgt aactgaaag tatttcgatt tcttgcttt atatatcttG
241 TGGAAAGGAC GAAACACCGT TAGGGTTAGG GTTAGGGTTA gtttAagagc taGGCCAACA
301 TGAGGATCAC CCATGTCTGC AGGGCCtagc aagttTaaat aaggctagtc cgttatcaac
361 ttGGCCAACA TGAGGATCAC CCATGTCTGC AGGGCCaagt ggcaccgagt cgggtcTCTG
421 CAGGTGCGACT CTAGAAAAACA TGAGGATCAC CCATGTCTGC AGTATTCCTCG GGTTCATTAG
481 ATCCTAAGGT ACCTAATTGC CTAGAAAAACA TGAGGATCAC CCATGTCCGA CACCGAACGT
541 GCGACAAAGC TAAGTGCGCC GTACGGAGAT CCGATAAACA TGAGGATCAC CCATGTCCTT
601 GCGAGATTAC GCGGCACATT ATTTGGTCGAC GCCGCGAGCT ATCGTAAACA TGAGGATCAC
661 CCATGTGCGA CCGAGGGCTC TAGAAATTTT TTTGCGGCCG GACTCTAGA TCATAATCAG

```

721 CCATACCACA TTTGTAGAGG TTTTACTTGC TTTAAAAAC CTCCCACACC TCCCCTGAA  
781 CCTGAAACAT AAAATGAATG CAATTGTGTG TGTTAACTTG TTTATTGCAG CTTATAATGG  
841 TTACAAATAA AGCAATAGCA TCACAAATTT CACAAATAAA GCATTTTTTT CACTGCATC  
901 TAGTTGTGGT TTGTCCAAAC TCATCAATGT ATCTTAAAGG GTAAATTGTA AGCGTTAATA  
961 TTTTGTAAAA ATTCGCGTTA AATTTTTGTT AAATCAGCTC ATTTTTTAAC CAATAGGCCG  
1021 AAATCGGCAA AATCCCTTAT AAATCAAAAG AATAGACCGA GATAGGGTTG AGTGTGTTC  
1081 CAGTTTGGAA CAAGAGTCCA CTATTAAGA ACGTGGACTC CAACGTCAA GGGCGAAAAA  
1141 CCGTCTATCA GGGCGATGGC CCACTACGTG AACCATCACC CTAATCAAGT TTTTGGGGT  
1201 CGAGGTGCCG TAAAGCACTA AATCGGAACC CTAAGGGAG CCCCCGATTT AGAGCTTGAC  
1261 GGGGAAAGCC GGCGAACGTG GCGAGAAAGG AAGGGAAGAA AGCGAAAGGA GCGGGCGCTA  
1321 GGGCGCTGGC AAGTGTAGCG GTCACGCTGC GCGTAACCAC CACACCCGCC GCGCTTAATG  
1381 CGCCGCTACA GGGCGCGTCA GGTGGCACTT TTCGGGAAA TGTGCGCGGA ACCCCTATTT  
1441 GTTTATTTTT CTAATACAT TCAAATATGT ATCCGCTCAT GAGACAATAA CCCTGATAAA  
1501 TGCTTCAATA ATATTGAAAA AGGAAGAGTC CTGAGGCGGA AAGAACCAGC TGTGGAATGT  
1561 GTGTCAGTTA GGGTGTGGAA AGTCCCCAGG CTCCCCAGCA GGCAGAAAGTA TGCAAAGCAT  
1621 GCATGATTCA GGGGATGCAA CCAGTGTGG AAAGTCCCA GGCTCCAG CAGGCAGAA  
1681 TATGCAAAGC ATGCATCTCA ATTAGTCAGC AACCATAGTC CCGCCCCTAA CTCCGCCAT  
1741 CCCGCCCTA ACTCCGCCA GTTCCGCCA TTCTCCGCC CATGGCTGAC TAATTTTTTT  
1801 TATTTATGCA GAGGCCGAGG CCGCTCGGC CTCTGAGTA TTCCAGAAAGT AGTGAGGAGG  
1861 CTTTTTTGGA GCTTAGGCT TTTGCAAAGA TCGATCAAGA GACAGGATGA GGATCGTTTC  
1921 GCATGATTGA ACAAGATGGA TTGCACGAG GTTCTCCGC CGCTTGGGTG GAGAGGCTAT  
1981 TCGGCTATGA CTGGGCACAA CAGACAATCG GCTGCTCTGA TGCCGCCGTG TTCCGGCTGT  
2041 CAGCGCAGGG GCGCCCGGTT CTTTTGTCA AGACCGACCT GTCCGGTGCC CTGAATGAAC  
2101 TGCAAGACGA GGCAGCGCGG CTATCGTGGC TGGCCACGAC GGGCGTTCCT TGCGCAGCTG  
2161 TGCTCGACTG TGTCACTGAA GCGGGAAGGG ACTGGCTGCT ATTGGGCGAA GTGCCGGGGC  
2221 AGGATCTCCT GTCATCTCAC CTTGCTCCTG CCGAGAAAGT ATCCATCATG GCTGATGCAA  
2281 TGCGGCGGCT GCATACGCTT GATCCGGCTA CTGCCATT CGACCACCAA GCGAAACATC  
2341 GCATCGAGCG AGCACGTA CTGGATGGAAG CCGGTCTTGT CGATCAGGAT GATCTGGACG  
2401 AAGAGCATCA GGGGCTCGCG CCAGCCGAAC TGTTCGCCAG GCTCAAGGCG AGCATGCCCG  
2461 ACGGCGAGGA TCTCGTCGTG ACCCATGGCG ATGCCTGCTT GCCGAATATC ATGGTGGAAA  
2521 ATGGCCGCTT TTCTGGATTG ATCGACTGTG GCCGGCTGGG TGTGGCGGAC CGCTATCAGG  
2581 ACATAGCGTT GGCTACCCGT GATATTGCTG AAGAGCTTGG CGGCGAATGG GCTGACCCGT  
2641 TCCTAGTCTT TTGCTGATC GCCGTCCC ATTCCGAGCG CATCGCCTT TATCGCCTT  
2701 TTGACGAGTT CTTCTGAGCG GGACTCTGGG GTTCGAAATG ACCGACCAAG CGACGCCCAA  
2761 CCTGCCATCA CGAGATTTCT ATTCCACCGC CGCCTTCTAT GAAAGGTTGG GCTTCGGAAT  
2821 CGTTTTCCGG GACGCCGGCT GGATGATCCT CCAGCGCGGG GATCTCATGC TGGAGTTCTT  
2881 CGCCACCCT AGGGGGAGGC TAACTGAAAC ACGGAAGGAG ACAATACCGG AAGGAACCCG  
2941 CGCTATGACG GCAATAAAAA GACAGAATAA AACGCACGGT GTTGGGTCGT TTGTTCAATA  
3001 ACGCGGGGTT CGGTCCCAGG GCTGGCACTC TGTCGATACC CCACCGAGAC CCCATTGGGG  
3061 CCAATACGCC CGCGTTTCTT CTTTTCCCC ACCCCACCCC CCAAGTTCGG GTGAAGGCC  
3121 AGGGCTCGCA GCCAACGTCG GGGCGGCAGG CCCTGCCATA GCCTCAGGTT ACTCATATAT  
3181 ACTTTAGATT GATTTAAAAA TTCATTTTTA ATTTAAAAGG ATCTAGGTGA AGATCCTTTT  
3241 TGATAATCTC ATGACCAAAA TCCCTAACG TGAGTTTTCTG TTCCACTGAG CGTCAGACCC  
3301 CGTAGAAAAG ATCAAAGGAT CTTCTTGAGA TCCTTTTTTT CTGCGGTAA TCTGCTGCTT  
3361 GCAAAACAAA AAACCACCGC TACCAGCGGT GGTGTGTTG CCGGATCAAG AGCTACCAAC  
3421 TCTTTTTCCG AAGGTAAGT GCTTACGAG AGCGCAGATA CCAAATACTG TCCTTCTAGT  
3481 GTAGCCGTAG TTAGGCCACC ACTTCAAGAA CTCTGTAGCA CCGCCTACAT ACCTCGCTCT  
3541 GCTAATCCTG TTACCAGTGG CTGCTGCCAG TGCGGATAAG TCGTGTCTTA CCGGGTTGGA  
3601 CTCAAGACGA TAGTTACCGG ATAAGGCGCA GCGGTCCGGG TGAACGGGGG GTTCGTGCAC  
3661 ACAGCCCAGC TTGGAGCGAA CGACCTACAC CGAACTGAGA TACCTACAGC GTGAGCTATG  
3721 AGAAAAGCGCC ACGTTCCCG AAGGGAGAAA GCGGACAGG TATCCGGTAA GCGGCAGGGT  
3781 CGAACAGGA GAGCGCACGA GGGAGCTTCC AGGGGAAAAC GCCTGGTATC TTTATAGTCC  
3841 TGTCGGGTTT CGCCACCTCT GACTTGAGCG TCGATTTTTG TGATGCTCGT CAGGGGGGCG  
3901 GAGCCTATGG AAAAACGCCA GCAACGCGG CTTTTACGG TTCTGGCCT TTTGCTGGCC  
3961 TTTTGCTAC ATGTTCTTTC CTGCGTTATC CCCTGATTCT GTGGATAACC GTATTACCCG  
4021 CATGCAT

//

## Sequence of psgRNA2.0-6xPP7-telo in GenBank format

LOCUS psgRNA2\_0\_6xPP7 4021 bp ds-DNA circular 02-JAN-2016  
DEFINITION pEYFP-N1  
ACCESSION  
KEYWORDS  
ORGANISM other sequences; artificial sequences; vectors.  
COMMENT  
COMMENT  
COMMENT ApEinfo:methylated:1  
FEATURES Location/Qualifiers  
misc\_feature 259..687  
/label=sgRNA  
/ApEinfo\_fwdcolor=#ffff80  
/ApEinfo\_revcolor=green  
/ApEinfo\_graphicformat=arrow\_data {{0 1 2 0 0 -1}} {} 0  
width 5 offset 0  
misc\_feature 418..442  
/label=PP7  
/ApEinfo\_fwdcolor=cyan  
/ApEinfo\_revcolor=green  
/ApEinfo\_graphicformat=arrow\_data {{0 1 2 0 0 -1}} {} 0  
width 5 offset 0  
misc\_feature 293..317  
/label=PP7(1)  
/ApEinfo\_label=PP7  
/ApEinfo\_fwdcolor=cyan  
/ApEinfo\_revcolor=green  
/ApEinfo\_graphicformat=arrow\_data {{0 1 2 0 0 -1}} {} 0  
width 5 offset 0  
rep\_origin complement(1069..1375)  
/label=f1\_origin  
/ApEinfo\_fwdcolor=pink  
/ApEinfo\_revcolor=pink  
/ApEinfo\_graphicformat=arrow\_data {{0 1 2 0 0 -1}} {} 0  
width 5 offset 0  
promoter 1454..1482  
/label=AmpR\_promoter  
/ApEinfo\_fwdcolor=pink  
/ApEinfo\_revcolor=pink  
/ApEinfo\_graphicformat=arrow\_data {{0 1 2 0 0 -1}} {} 0  
width 5 offset 0  
misc\_feature 637..661  
/label=PP7(2)  
/ApEinfo\_label=PP7  
/ApEinfo\_fwdcolor=cyan  
/ApEinfo\_revcolor=green  
/ApEinfo\_graphicformat=arrow\_data {{0 1 2 0 0 -1}} {} 0  
width 5 offset 0  
misc\_feature complement(1554..1769)  
/label=SV40\_enhancer  
/ApEinfo\_fwdcolor=pink  
/ApEinfo\_revcolor=pink  
/ApEinfo\_graphicformat=arrow\_data {{0 1 2 0 0 -1}} {} 0  
width 5 offset 0  
promoter 10..258  
/dnas\_title="Human U6 Promoter"  
/vntifkey="29"  
/label=Human U6 Promoter  
/ApEinfo\_fwdcolor=pink  
/ApEinfo\_revcolor=pink  
/ApEinfo\_graphicformat=arrow\_data {{0 1 2 0 0 -1}} {} 0  
width 5 offset 0  
promoter 1566..1834  
/label=SV40\_promoter  
/ApEinfo\_fwdcolor=pink  
/ApEinfo\_revcolor=pink  
/ApEinfo\_graphicformat=arrow\_data {{0 1 2 0 0 -1}} {} 0  
width 5 offset 0

```

rep_origin 1733..1810
  /label=SV40_origin
  /ApEinfo_fwdcolor=pink
  /ApEinfo_revcolor=pink
  /ApEinfo_graphicformat=arrow_data {{0 1 2 0 0 -1}} {} 0
  width 5 offset 0
CDS      1917..2711
  /gene="NeoR/KanR"
  /note="ORF frame 1"
  /translation="MIEQDGLHAGSPAAWVERLFGYDWAQQTIGCSDAAVFRLSAQGR
PVLVFKTDLSGALNELQDEAARLSWLATTGVPCA AVL DVVTEAGRDWLLLGEVPGQDL
LSSHLAPAEEKVSIMADAMRRLHTLDPATCFPDHQAKHRIERARTRMEAGLVDQDDLDE
EHQGLAPAELFARLKASMPDGEDLVVTHGDACLPNIMVENGRFSGFIDCGRLGVADRY
QDIALATRDIAEELGGEWADRFLVLYGIAAPDSQRIAFYRLLDEFF*"
  /label=NeoR/KanR
  /ApEinfo_fwdcolor=pink
  /ApEinfo_revcolor=pink
  /ApEinfo_graphicformat=arrow_data {{0 1 2 0 0 -1}} {} 0
  width 5 offset 0
terminator 2886..3155
  /label=TK_PA_terminator
  /ApEinfo_fwdcolor=pink
  /ApEinfo_revcolor=pink
  /ApEinfo_graphicformat=arrow_data {{0 1 2 0 0 -1}} {} 0
  width 5 offset 0
rep_origin 3303..3922
  /label=pBR322_origin
  /ApEinfo_fwdcolor=pink
  /ApEinfo_revcolor=pink
  /ApEinfo_graphicformat=arrow_data {{0 1 2 0 0 -1}} {} 0
  width 5 offset 0
misc_feature 564..588
  /label=PP7(3)
  /ApEinfo_label=PP7
  /ApEinfo_fwdcolor=cyan
  /ApEinfo_revcolor=green
  /ApEinfo_graphicformat=arrow_data {{0 1 2 0 0 -1}} {} 0
  width 5 offset 0
misc_feature 491..515
  /label=PP7(4)
  /ApEinfo_label=PP7
  /ApEinfo_fwdcolor=cyan
  /ApEinfo_revcolor=green
  /ApEinfo_graphicformat=arrow_data {{0 1 2 0 0 -1}} {} 0
  width 5 offset 0
misc_feature 354..378
  /label=PP7(5)
  /ApEinfo_label=PP7
  /ApEinfo_fwdcolor=cyan
  /ApEinfo_revcolor=green
  /ApEinfo_graphicformat=arrow_data {{0 1 2 0 0 -1}} {} 0
  width 5 offset 0
misc_feature 259..280
  /label=telomere target sequence
  /ApEinfo_fwdcolor=#008000
  /ApEinfo_revcolor=green
  /ApEinfo_graphicformat=arrow_data {{0 1 2 0 0 -1}} {} 0
  width 5 offset 0

```

ORIGIN

```

1 TAGTTATTAaggcctatt tccatgatt cctcatatt tgcataacg atacaaggct
61 gttagagaga taattggaat taattgact gtaaacacaa agatattagt acaaaatagc
121 tgcagtagaa agtaataatt tctgggtag ttgcatgtt taaaattag ttttaaatg
181 gactatcata tgcctaccgt aactgaaag tatttcgatt tcttgcttt atatatctG
241 TGGAAAGGAC GAAACACCGT TAGGGTTAGG GTTAGGGTTA gtttAagagc taGGAGCAGA
301 CGATATGGCG TCGCTCCTag caagttTaaa taaggctagt ccggtatcaa cttCCAGCAG
361 AGCATATGGG CTCGCTG Gaa gggcaccga gtcgggtcTC TGCAGGTCGA CTCTAGAGGA
421 GCAGACGATA TGGCGTCGCT CCTGCAGTAT TCCCGGGTTC ATTAGATCCT AAGGTACCTA
481 ATTGCCTAGA CCAGACAGC ATATGGGCTC GCTGGCGACA CCGAACGTGC GACAAAAGCTA
541 AGTGCGCCGT ACGGAGATCC GATGGAGCAG ACGATATGGC GTCGCTCCCT TGCGAGATTA
601 CGCGGCACAT TATTGGTCGA CGCCGCGAGC TATCGTCCAG CAGAGCATAT GGGCTCGCTG

```

661 GGGACCGAGG GCTCTAGAAA TTTTTTTCGCG GCCGCGACTC TAGATCATAA TCAGCCATAC  
721 CACATTTGTA GAGGTTTTAC TTGCTTTAAA AAACCTCCCA CACCTCCCC TGAACCTGAA  
781 ACATAAAATG AATGCAATTG TTGTTGTAA CTTGTTTATT GCAGTTATA ATGGTTACAA  
841 ATAAAGCAAT AGCATCACAA ATTTACAAA TAAAGCATTT TTTTACTGC ATTCTAGTTG  
901 TGGTTTGTCC AAACATCA ATGTATCTTA AGGCGTAAAT TGTAAGCGTT AATATTTTGT  
961 TAAAATTTCG GTTAAATTTT TGTTAAATCA GCTCATTTTT TAACCAATAG GCCGAAATCG  
1021 GCAAAATCCC TTATAATCA AAAGAATAGA CCGAGATAGG GTTGAGTGTG GTTCCAGTTT  
1081 GGAACAAGAG TCCACTATTA AAGAACGTGG ACTCCAACGT CAAAGGGCGA AAAACCGTCT  
1141 ATCAGGGCGA TGGCCACTA CGTGAACCAT CACCCTAATC AAGTTTTTTG GGGTCGAGGT  
1201 GCCGTAAAGC ACTAAATCGG AACCTAAAG GGAGCCCCCG ATTTAGAGCT TGACGGGGAA  
1261 AGCCGGCGAA CGTGGCGAGA AAGGAAGGGA AGAAAGCGAA AGGAGCGGGC GTAGGGCGC  
1321 TGGCAAGTGT AGCGGTCACG CTGCGCGTAA CCACCACACC CGCCGCGCTT AATGCGCCGC  
1381 TACAGGGCGC GTCAGGTGGC ACTTTTCGGG GAAATGTGCG CGGAACCCCT ATTTGTTTAT  
1441 TTTTCTAAAT ACATTCAAAT ATGTATCCGC TCATGAGACA ATAACCCTGA TAAATGCTTC  
1501 AATAATATTG AAAAAGGAAG AGTCCTGAGG CGGAAAGAAC CAGCTGTGGA ATGTGTGTCA  
1561 GTTAGGGTGT GAAAGTCCC CAGGCTCCC AGCAGGCAGA AGTATGCAAA GCATGCATCT  
1621 CAATTAGTCA GCAACCAGGT GTGGAAAAGT CCCAGGCTCC CCAGCAGGCA GAAGTATGCA  
1681 AAGCATGCAT CTCAATTAGT CAGCAACCAT AGTCCCGCCC CTAACCTCCG CCATCCCGCC  
1741 CCTAACTCCG CCCAGTTCG CCCATTCTCC GCCCATGGC TGACTAATTT TTTTATTTA  
1801 TGCAGAGGCC GAGGCCGCT CGGCCTCTGA GCTATTCCAG AAGTAGTGAG GAGGCTTTTT  
1861 TGGAGGCAGT GACTTTTTCG AAGATCGATC AAGAGACAGG ATGAGGATCG TTTTCGATGA  
1921 TTGAACAAGA TGGATTGCAC GCAGGTTCTC CGGCCGCTTG GGTGGAGAGG CTATTCGGCT  
1981 ATGACTGGGC ACAACAGACA ATCGGCTGCT CTGATGCCG CGTGTTCCCG CTGTCAGCGC  
2041 AGGGGCGCCC GGTTCTTTT GTCAAGACCG ACCTGTCCCG TGCCCTGAAT GAACTGCAAG  
2101 ACGAGGCAGC GCGGTATCG TGGCTGGCCA CGACGGGCGT TCCTTGCGCA GCTGTGCTCG  
2161 ACGTTGTAC TGAAGCGGA AGGGACTGGC TGCTATTGGG CGAAGTGCCG GGGCAGGATC  
2221 TCCTGTATC TCACCTTGCT CTTGCCGAGA AAGTATCCAT CATGGCTGAT GCAATGCGGC  
2281 GGCTGCATC GCTTGATCCG GCTACCTGCC CATTGACCA CCAAGCGAAA CATCGCATCG  
2341 AGCAGGCAGC TACTCGGATG GAAGCCGTC TTGTGATCA GGATGATCTG GACGAAGAGC  
2401 ATCAGGGGCT CGCGCCAGCC GAAGTGTTCG CCAGGCTCAA GGCGAGCATG CCCGACGGCG  
2461 AGGATCTCGT CGTGACCAT GGCGATGCCT GCTTGCCGAA TATCATGGTG GAAAATGGCC  
2521 GCTTTTCTGG ATTCATCGAC TGTGGCCGGC TGGGTGTGGC GGACCGCTAT CAGGACATAG  
2581 CGTTGGCTAT GCTGAAGAGC TTGGCCGGA ATGGGCTGAC CGTTCCTCG  
2641 TGCTTTACGG TATCGCCGCT CCCGATTTCG AGCGCATCGC CTCTATCGC CTCTTGACG  
2701 AGTTCTTCTG AGCGGGACTC TGGGGTTCGA AATGACCGAC CAAGCGACGC CCAACCTGCC  
2761 ATCACGAGAT TTCGATTCCA CCGCCGCTT CTATGAAAGG TTGGGCTTCG GAATCGTTTT  
2821 CCGGACGCC GGCTGGATGA TCCTCCAGCG CGGGGATCTC ATGCTGGAGT TCTTCGCCA  
2881 CCCGAGGGG AGGCTAATG AAACACGGAA GGAGACAATA CCGGAAGGAA CCCGCGCTAT  
2941 GACGGCAATA AAAAGACAGA ATAAAACGCA CGGTGTTGGG TCGTTTGTTC ATAAACGCGG  
3001 GGTTCCGGTCC CAGGGCTGGC ACTCTGTGCA TACCCACCG AGACCCCAT GGGCCAATA  
3061 CGCCCGGCTT TCTTCCTTT CCCACCCA CCCCCAAGT TCGGGTGAAG GCCCAGGGCT  
3121 CGCAGCCAAC GTCGGGGCGG CAGGCCCTGC CATAGCCTCA GTTACTCAT ATATACTTTA  
3181 GATTGATTTA AAACCTCATT TTTAATTTAA AAGGATCTAG GTGAAGATCC TTTTGTATA  
3241 TCTCATGACC AAAATCCCTT AACGTGAGTT TTCGTTCCAC TGAGCGTCAG ACCCCGTAGA  
3301 AAAGATCAAA GGATCTTCTT GAGATCCTT TTTTCTGCGC GTAATCTGCT GCTTGCAAA  
3361 AAAAAACCA CCGTACCAG CGGTGGTTT TTTGCGGAT CAAGAGCTAC CAACTTTTT  
3421 TCCGAAGGTA ACTGGCTTCA GCAGAGCGCA GATACCAAAT ACTGTCTTC TAGTGTAGCC  
3481 GTAGTTAGGC CACCCTTCA AGAAGTCTGT AGCACCCT ACATACCTCG CTCTGCTAAT  
3541 CCTGTTACCA GTGGCTGCTG CCAGTGGCGA TAAGTCGTGT CTTACCGGGT TGGACTCAAG  
3601 ACGATAGTTA CCGATAAGG CGCAGCGGTC GGGCTGAACG GGGGGTTCGT GCACACAGCC  
3661 CAGCTTGGAG GCAACGACCT ACACCGAAGT GAGATACCTA CAGCGTGAGC TATGAGAAAG  
3721 CGCCACGCTT CCCGAAGGGA GAAAGGCGGA CAGGTATCCG GTAAGCGGCA GGGTCGGAAC  
3781 AGGAGAGCGC ACGAGGGAGC TTCCAGGGG AAACGCTGG TATCTTATA GTCCTGTGCG  
3841 GTTTCGCCAC CTCTGACTTG AGCGTCGAT TTTGTGATG TCGTCAGGG GCGGAGCCT  
3901 ATGGAAAAAC GCCAGCAACG CGGCCTTTT ACGGTTCTG GCCTTTGCT GGCCTTTGC  
3961 TCACATGTTT TTTCTGCGT TATCCCCTGA TTCTGTGGAT AACCGTATTA CCGCATGCA  
4021 T

//

## Sequence of psgRNA2.0-6xPP7-cent in GenBank format

LOCUS psgRNA2\_0\_6xPP7 4018 bp ds-DNA circular 10-MAR-2016  
DEFINITION pEYFP-N1  
ACCESSION  
KEYWORDS  
ORGANISM other sequences; artificial sequences; vectors.  
COMMENT  
COMMENT ApEinfo:methylated:1  
FEATURES Location/Qualifiers  
misc\_feature join(259..259,278..684)  
/label=sgRNA  
/ApEinfo\_fwdcolor=#ffff80  
/ApEinfo\_revcolor=green  
/ApEinfo\_graphicformat=arrow\_data {{0 1 2 0 0 -1} {} 0}  
width 5 offset 0  
misc\_feature 415..439  
/label=PP7  
/ApEinfo\_fwdcolor=cyan  
/ApEinfo\_revcolor=green  
/ApEinfo\_graphicformat=arrow\_data {{0 1 2 0 0 -1} {} 0}  
width 5 offset 0  
misc\_feature 290..314  
/label=PP7(1)  
/ApEinfo\_label=PP7  
/ApEinfo\_fwdcolor=cyan  
/ApEinfo\_revcolor=green  
/ApEinfo\_graphicformat=arrow\_data {{0 1 2 0 0 -1} {} 0}  
width 5 offset 0  
rep\_origin complement(1066..1372)  
/label=f1\_origin  
/ApEinfo\_fwdcolor=pink  
/ApEinfo\_revcolor=pink  
/ApEinfo\_graphicformat=arrow\_data {{0 1 2 0 0 -1} {} 0}  
width 5 offset 0  
promoter 1451..1479  
/label=AmpR\_promoter  
/ApEinfo\_fwdcolor=pink  
/ApEinfo\_revcolor=pink  
/ApEinfo\_graphicformat=arrow\_data {{0 1 2 0 0 -1} {} 0}  
width 5 offset 0  
misc\_feature 634..658  
/label=PP7(2)  
/ApEinfo\_label=PP7  
/ApEinfo\_fwdcolor=cyan  
/ApEinfo\_revcolor=green  
/ApEinfo\_graphicformat=arrow\_data {{0 1 2 0 0 -1} {} 0}  
width 5 offset 0  
misc\_feature complement(1551..1766)  
/label=SV40\_enhancer  
/ApEinfo\_fwdcolor=pink  
/ApEinfo\_revcolor=pink  
/ApEinfo\_graphicformat=arrow\_data {{0 1 2 0 0 -1} {} 0}  
width 5 offset 0  
promoter 10..258  
/dnas\_title="Human U6 Promoter"  
/vntifkey="29"  
/label=Human U6 Promoter  
/ApEinfo\_fwdcolor=pink  
/ApEinfo\_revcolor=pink  
/ApEinfo\_graphicformat=arrow\_data {{0 1 2 0 0 -1} {} 0}  
width 5 offset 0  
promoter 1563..1831  
/label=SV40\_promoter  
/ApEinfo\_fwdcolor=pink  
/ApEinfo\_revcolor=pink  
/ApEinfo\_graphicformat=arrow\_data {{0 1 2 0 0 -1} {} 0}  
width 5 offset 0  
rep\_origin 1730..1807

```

/label=SV40_origin
/ApEinfo_fwdcolor=pink
/ApEinfo_revcolor=pink
/ApEinfo_graphicformat=arrow_data {{0 1 2 0 0 -1}} {} 0
width 5 offset 0
CDS      1914..2708
/label=NeoR/KanR
/translation="MIEQDGLHAGSPAAWVERLFGYDWAQQTIGCSDAAVFRLSAQGR
PVLVFKTDLGALNELQDEAARLSWLATTGVPCAAVLDVVTEAGRDWLLLGEVPGQDL
LSSHLAPAEKVSIMADAMRRLHTLDPATCPFDHQA KHRIERARTRMEAGLVDQDDLDE
EHQGLAPAELEFARLKASMPDGEDLVVTHGDACLPNIMVENGRFSGFIDCGRLGVADRY
QDIALATRDIAEELGGEWADRFLVLYGIAAPDSQRIAFYRLLDEFF*"
/label=NeoR/KanR
/ApEinfo_fwdcolor=pink
/ApEinfo_revcolor=pink
/ApEinfo_graphicformat=arrow_data {{0 1 2 0 0 -1}} {} 0
width 5 offset 0
terminator 2883..3152
/label=TK_PA_terminator
/ApEinfo_fwdcolor=pink
/ApEinfo_revcolor=pink
/ApEinfo_graphicformat=arrow_data {{0 1 2 0 0 -1}} {} 0
width 5 offset 0
rep_origin 3300..3919
/label=pBR322_origin
/ApEinfo_fwdcolor=pink
/ApEinfo_revcolor=pink
/ApEinfo_graphicformat=arrow_data {{0 1 2 0 0 -1}} {} 0
width 5 offset 0
misc_feature 561..585
/label=PP7(3)
/ApEinfo_label=PP7
/ApEinfo_fwdcolor=cyan
/ApEinfo_revcolor=green
/ApEinfo_graphicformat=arrow_data {{0 1 2 0 0 -1}} {} 0
width 5 offset 0
misc_feature 488..512
/label=PP7(4)
/ApEinfo_label=PP7
/ApEinfo_fwdcolor=cyan
/ApEinfo_revcolor=green
/ApEinfo_graphicformat=arrow_data {{0 1 2 0 0 -1}} {} 0
width 5 offset 0
misc_feature 351..375
/label=PP7(5)
/ApEinfo_label=PP7
/ApEinfo_fwdcolor=cyan
/ApEinfo_revcolor=green
/ApEinfo_graphicformat=arrow_data {{0 1 2 0 0 -1}} {} 0
width 5 offset 0
misc_feature 260..277
/label=centromere targeting sequence
/ApEinfo_fwdcolor=cyan
/ApEinfo_revcolor=green
/ApEinfo_graphicformat=arrow_data {{0 1 2 0 0 -1}} {} 0
width 5 offset 0

```

ORIGIN

```

1 TAGTTATTAg aggcctatt tccatgatt ccttcattt tgcatatagc atacaaggct
61 gtagagaga taattggaat taattgact gtaaacacaa agatattagt acaaaatagc
121 tgacgtagaa agtaataatt tcttggtag tttgcagttt taaaattatg ttttaaatg
181 gactatcata tgctaccgt aactgaaag tatttcgatt tcttgcttt atatatcttG
241 TGGAAAGGAC GAAACACCGA ATCTGCAAGT GGATATTgtt tAagagctag GAGCAGACGA
301 TATGGCGTCG CTCtagcaa gttTaaataa ggctagtcg ttatacaatt CCAGCAGAGC
361 ATATGGGCTC GCTGGAagtg gcaccgagtc ggtgcTCTGC AGGTGCGACTC TAGAGGAGCA
421 GACGATATGG CGTCGCTCCT GCAGTATTC CGGGTTCATT AGATCCTAAG GTACCTAATT
481 GCCTAGACCA GCAGAGCATA TGGGCTCGCT GCGCACCAG AACGTGCGAC AAAGCTAAGT
541 GCGCCGTACG GAGATCCGAT GGAGCAGACG ATATGGCGTC GCTCCCTTGC GAGATTACGC
601 GGCACATTAT TGGTGCAGCG CGCGAGCTAT CGTCCAGCAG AGCATATGGG CTCGCTGGGG
661 ACCGAGGGCT CTAGAAATTT TTTTGCGGCC GCGACTCTAG ATCATAATCA GCCATACCAC

```



721 ATTTGTAGAG GTTTACTTG CTTAAAAA CCTCCACAC CTCCCCCTGA ACCTGAAACA  
781 TAAAATGAAT GCAATTGTTG TTGTTAACTT GTTTATTGCA GCTTATAATG GTTACAAATA  
841 AAGCAATAGC ATCACA AATT TCACAAATAA AGCATTTTTT TCACCTGCATT CTAGTTGTGG  
901 TTTGTCCAAA CTCATCAATG TATCTTAAAG CGTAAATTGT AAGCGTTAAT ATTTTGTAA  
961 AATTCGCGTT AAATTTTTGT TAAATCAGCT CATTTTTTAA CCAATAGGCC GAAATCGGCA  
1021 AAATCCCTTA TAAATCAAAA GAATAGACCG AGATAGGGTT GAGTGTTGTT CCAGTTTGG  
1081 ACAAGAGTCC ACTATTTAAAG AACGTGGACT CCAACGTCAA AGGGCGAAAA ACCGTCTATC  
1141 AGGGCGATGG CCCACTACGT GAACCATCAC CCGTAAATCAAG TTTTTTGGGG TCGAGGTGCC  
1201 GTAAAGCACT AAATCGGAAC CCTAAAGGGA GCCCCGATT TAGAGCTTGA CGGGGAAAGC  
1261 CGGCGAACGT GGCGAGAAAAG GAAGGGAAGA AAGCGAAAGG AGCGGGCGCT AGGGCGCTGG  
1321 CAAGTGTAGC GGTACGCTG CGCGTAACCA CCACACCCGC CGCGCTTAAT GCGCCGCTAC  
1381 AGGGCGCTC AGGTGGCACT TTTCGGGAA ATGTGCGCGG AACCCCTATT TGTTATTTT  
1441 TCTAAATACA TTCAAATATG TATCCGCTCA TGAGACAATA ACCCTGATAA ATGCTTCAAT  
1501 AATATTGAAA AAGGAAGAGT CCTGAGGCGG AAGAACCAG CTGTGGAATG TGTGTCAGTT  
1561 AGGGTGTGGA AAGTCCCCAG GCTCCCCAGC AGGCAGAAGT ATGCAAAGCA TGCATCTCAA  
1621 TTAGTCAGTA AGCGGGAAGG GAAAGTCCAG AGGTCCCA GCAGGCAGAA GTATGCAAAG  
1681 CATGCATCTC AATTAGTCAG CAACCATAGT CCCGCCCTA ACTCCGCCA TCCCGCCCT  
1741 AACTCCGCC AGTTCGCC ATTCTCGCC CCATGGCTGA CTAATTTTTT TTATTTATGC  
1801 AGAGGCCGAG GCCGCTCGG CCTCTGAGT ATTCCAGAAG TAGTGAGGAG GCTTTTTTGG  
1861 AGCCATAGG TTTTGCAAAG ATCGATCAAG AGACAGGATG AGGATCGTTT CGCATGATG  
1921 AACAAAGATGG ACCAGCAGCA GGTCTCCGG CCGCTTGGGT GGAGAGGCTA TTCGGCTATG  
1981 ACTGGGCACA ACAGACAATC GGCTGCTCTG ATGCCGCGT GTTCCGGCTG TCAGCGCAGG  
2041 GCGGCCCGGT TCTTTTTGTC AAGACCGACC TGTCCGGTGC CCTGAATGAA CTGCAAGACG  
2101 AGGCAGCGG GCTATCGTGG CTGGCCACGA CGGGCGTTC TTGCGCAGCT GTGCTCGACG  
2161 TTGTCACTGA AGCGGGAAGG GACTGGCTG TATTGGGCGA AGTGCCGGGG CAGGATCTCC  
2221 TGTCATCTCA CTTGCTCCT GCCGAGAAAAG TATCCATCAT GGCTGATGCA ATGCGGGGGC  
2281 TGCATACGCT TGATCCGGCT ACCTGCCAT TCGACCACCA AGCGAAACAT CGCATCGAGC  
2341 GAGCACGTAC TCGGATGGAA GCCGTCTTG TCGATCAGGA TGATCTGGAC GAAGAGCATC  
2401 AAGGGCTCG GCCAGCAGCA GGTTCGCCA GGCTCAAGGC GAGCATGCC GACGGCGAGG  
2461 ATCTCGTCGT GACCCATGGC GATGCCTGCT TGCCGAATAT CATGGTGGAA AATGGCCGCT  
2521 TTTCTGGATT CATCGACTGT GGCCGGCTGG GTGTGGCGGA CCGCTATCAG GACATAGCGT  
2581 TGGTACCCG TGATATTGCT GAAGAGCTTG GCGGCGAATG GGCTGACCGC TTCCTCGTGC  
2641 TTTACGGTAT GGTTCGAAA GATTGCGAGC GCATCGCCTT CTATCGCCTT CTGACGAGT  
2701 TCTTCTGAGC GGGACTCTGG GTTTCGAAAT GACCGACCAA GCGACGCCA ACCTGCCATC  
2761 ACGAGATTTC GATTCCACCG CCGCCTTCTA TGAAAGGTTG GGCTTCGGA TCGTTTTCCG  
2821 GGACGCCGGC TGGATGATC TCCAGCGCGG GGATCTCATG CTGGAGTTCT TCGCCACCC  
2881 TAGGGGAGG CTAAGTAAA CACGGAAGGA GACAATACC GAAGGAACCC GCGCTATGAC  
2941 GGCAATAAAA AGACAGAATA AAACGCACGG TGTGGGTCG TTTGTTTATA AACCGGGGGT  
3001 TCGGTCCCAG GGCTGGCACT CTGTGATAC CCCACCGAGA CCCATTGGG GCCAATACGC  
3061 CCGCGTTTCT TCCTTTTCCC CACCCACCC CCAAAGTTCG GGTGAAGGCC CAGGGCTCGC  
3121 AGCCAACGTC GGGGCGGCG GCCCTGCCAT AGCCTCAGGT TACTCATATA TACTTTAGAT  
3181 TGATTTAAAA CTTCATTTTT AATTTAAAAG GATCTAGGTG AAGATCCTTT TTGATAATCT  
3241 CATGACAAA ATCCCTTAACT GTGAGTTTTT GTTCCACTGA GCGTCAGACC CCGTAGAAAA  
3301 GATCAAAGGA TCTTCTGAG ATCCTTTTTT TCTGCGGTA ATCTGCTGCT TGCAAACAAA  
3361 AAAACCACCG CTACCAGCGG TGGTTTTTTT GCCGGATCAA GAGTACCAA CTCTTTTTCC  
3421 GAAGGTAAGT GGCTTACGA GAGCGCAGAT ACCAAATACT GTCCTTCTAG TGTAGCCGTA  
3481 GTTAGGCCAC CACTTCAAGA ACTCTGTAGC ACCGCCTACA TACCTCGCTC TGCTAATCCT  
3541 GTTACCAGTG GCTGTGCCA GTGGCGATAA GTCGTGCTT ACCGGGTTGG ACTCAAGACG  
3601 ATAGTTACCG GATAAGGCGC AGCGGTCCGG CTGAACGGGG GTTTCGTGCA CACAGCCCAG  
3661 CTTGGAGCGA ACGACCTACA CCGAAGTGG ATACCTACAG CGTGAGCTAT GAGAAAGCGC  
3721 CACGCTTCCC GAAGGGAGAA AGGCGGACAG GTATCCGTA AGCGGCAGGG TCGGAACAGG  
3781 AGAGCGCAG AGGGAGCTT CAGGGGAAA CGCCTGGTAT CTTTATAGTC CTGTCGGGTT  
3841 TCGCCACCTC TGAATGAGC GTCGATTTTT GTGATGCTCG TCAAGGGGGG GGAGCCTATG  
3901 GAAAAACGCC AGCAACGCGG CCTTTTTACG GTTCTGGCC TTTTGTGGC CTTTTGCTCA  
3961 CATGTTCTT CTGCGTTAT CCCCTGATT TGTGATAAC CGTATTACCG CCATGCAT

//

## Sequence of psgRNA2.0-6xMS2-cent in GenBank format

LOCUS psgRNA2\_0\_6xMS2 4024 bp ds-DNA circular 10-MAR-2016  
DEFINITION pEYFP-N1  
ACCESSION  
KEYWORDS  
ORGANISM other sequences; artificial sequences; vectors.  
COMMENT  
COMMENT ApEinfo:methylated:1  
FEATURES Location/Qualifiers  
misc\_feature join(259..259,278..690)  
/label=sgRNA  
/ApEinfo\_fwdcolor=#ffff80  
/ApEinfo\_revcolor=green  
/ApEinfo\_graphicformat=arrow\_data {{0 1 2 0 0 -1} {} 0}  
width 5 offset 0  
misc\_feature 433..454  
/label=MS2SL  
/ApEinfo\_fwdcolor=#008000  
/ApEinfo\_revcolor=green  
/ApEinfo\_graphicformat=arrow\_data {{0 1 2 0 0 -1} {} 0}  
width 5 offset 0  
misc\_feature 503..524  
/label=MS2SL(1)  
/ApEinfo\_label=MS2SL  
/ApEinfo\_fwdcolor=#008000  
/ApEinfo\_revcolor=green  
/ApEinfo\_graphicformat=arrow\_data {{0 1 2 0 0 -1} {} 0}  
width 5 offset 0  
rep\_origin complement(1072..1378)  
/label=f1\_origin  
/ApEinfo\_fwdcolor=pink  
/ApEinfo\_revcolor=pink  
/ApEinfo\_graphicformat=arrow\_data {{0 1 2 0 0 -1} {} 0}  
width 5 offset 0  
promoter 1457..1485  
/label=AmpR\_promoter  
/ApEinfo\_fwdcolor=pink  
/ApEinfo\_revcolor=pink  
/ApEinfo\_graphicformat=arrow\_data {{0 1 2 0 0 -1} {} 0}  
width 5 offset 0  
misc\_feature 643..664  
/label=MS2SL(2)  
/ApEinfo\_label=MS2SL  
/ApEinfo\_fwdcolor=#008000  
/ApEinfo\_revcolor=green  
/ApEinfo\_graphicformat=arrow\_data {{0 1 2 0 0 -1} {} 0}  
width 5 offset 0  
misc\_feature complement(1557..1772)  
/label=SV40\_enhancer  
/ApEinfo\_fwdcolor=pink  
/ApEinfo\_revcolor=pink  
/ApEinfo\_graphicformat=arrow\_data {{0 1 2 0 0 -1} {} 0}  
width 5 offset 0  
promoter 10..258  
/dnas\_title="Human U6 Promoter"  
/vntifkey="29"  
/label=Human U6 Promoter  
/ApEinfo\_fwdcolor=pink  
/ApEinfo\_revcolor=pink  
/ApEinfo\_graphicformat=arrow\_data {{0 1 2 0 0 -1} {} 0}  
width 5 offset 0  
promoter 1569..1837  
/label=SV40\_promoter  
/ApEinfo\_fwdcolor=pink  
/ApEinfo\_revcolor=pink  
/ApEinfo\_graphicformat=arrow\_data {{0 1 2 0 0 -1} {} 0}  
width 5 offset 0

```

rep_origin 1736..1813
  /label=SV40_origin
  /ApEinfo_fwdcolor=pink
  /ApEinfo_revcolor=pink
  /ApEinfo_graphicformat=arrow_data {{0 1 2 0 0 -1}} {} 0
  width 5 offset 0
CDS      1920..2714
  /gene="NeoR/KanR"
  /note="ORF frame 1"
  /translation="MIEQDGLHAGSPAAWVERLFGYDWAQQTIGCSDAAVFRLSAQGR
PVLVFKTDLSGALNELQDEAARLSWLATTGVPCA AVL DVVTEAGRDWLLGEVPGQDL
LSSHLAPAEEKVSIMADAMRRLHTLDPATCPFDPHQAKHRIERARTRMEAGLVDQDDLDE
EHQGLAPAELFARLKASMPDGEDLVVTHGDACLPNIMVENGRFSGFIDCGRLGVADRY
QDIALATRDIAEELGGEWADRFLVLYGIAAPDSQRIAFYRLLDEFF*"
  /label=NeoR/KanR
  /ApEinfo_fwdcolor=pink
  /ApEinfo_revcolor=pink
  /ApEinfo_graphicformat=arrow_data {{0 1 2 0 0 -1}} {} 0
  width 5 offset 0
terminator 2889..3158
  /label=TK_PA_terminator
  /ApEinfo_fwdcolor=pink
  /ApEinfo_revcolor=pink
  /ApEinfo_graphicformat=arrow_data {{0 1 2 0 0 -1}} {} 0
  width 5 offset 0
rep_origin 3306..3925
  /label=pBR322_origin
  /ApEinfo_fwdcolor=pink
  /ApEinfo_revcolor=pink
  /ApEinfo_graphicformat=arrow_data {{0 1 2 0 0 -1}} {} 0
  width 5 offset 0
misc_feature 573..594
  /label=MS2SL(3)
  /ApEinfo_label=MS2SL
  /ApEinfo_fwdcolor=#008000
  /ApEinfo_revcolor=green
  /ApEinfo_graphicformat=arrow_data {{0 1 2 0 0 -1}} {} 0
  width 5 offset 0
misc_feature 290..323
  /label=MS2SL(4)
  /ApEinfo_label=MS2SL
  /ApEinfo_fwdcolor=#008000
  /ApEinfo_revcolor=green
  /ApEinfo_graphicformat=arrow_data {{0 1 2 0 0 -1}} {} 0
  width 5 offset 0
misc_feature 360..393
  /label=MS2SL(5)
  /ApEinfo_label=MS2SL
  /ApEinfo_fwdcolor=#008000
  /ApEinfo_revcolor=green
  /ApEinfo_graphicformat=arrow_data {{0 1 2 0 0 -1}} {} 0
  width 5 offset 0
misc_feature 260..277
  /label=centromere targeting sequence
  /ApEinfo_fwdcolor=cyan
  /ApEinfo_revcolor=green
  /ApEinfo_graphicformat=arrow_data {{0 1 2 0 0 -1}} {} 0
  width 5 offset 0
ORIGIN
1 TAGTTATTAaggcctatt tccatgatt ccttcattt tgcataacg atacaaggct
61 gttagagaga taattggaat taattgact gtaaacacaa agatattagt acaaaatagc
121 tgcagtagaa agtaataatt tctgggtag ttgcagttt taaaattag tttaaaatg
181 gactatcata tgcctaccgt aacttgaaag tatttcgatt tcttgcttt atatatctG
241 TGGAAAGGAC GAAACACCGA ATCTGCAAGT GGATATTggt tAagagctaG GCCAACATGA
301 GGATCACCCA TGTCTGCAGG GCTagcaag tTaaataag gctagtcctg tatcaactG
361 GCCAACATGA GGATCACCCA TGTCTGCAGG GCCaagtggc accgagtcgg tgcTCTGCAG
421 GTCGACTCTA GAAAACATGA GGATCACCCA TGTCTGCAGT ATTCCCGGGT TCATTAGATC
481 CTAAGGTACC TAATTGCCTA GAAAACATGA GGATCACCCA TGTCCGACAC CGAACGTGCG
541 ACAAAGCTAA GTGCGCCGTA CGGAGATCCG ATAAACATGA GGATCACCCA TGTCCTTGCG
601 AGATTACGCG GCACATTATT GGTCGACGCC GCGAGCTATC GTAAACATGA GGATCACCCA

```

661 TGTCGGACCG AGGGTCTAG AAATTTTTTT GCGGCCGCGA CTCTAGATCA TAATCAGCCA  
721 TACCACATTT GTAGAGGTTT TACTTGCTTT AAAAAACCTC CCACACCTCC CCCTGAACCT  
781 GAAACATAAA ATGAATGCAA TTGTTGTTGT TAACCTGTTT ATTGCAGCTT ATAATGGTTA  
841 CAAATAAAGC AATAGCATCA CAAATTTTAC AAATAAAGCA TTTTTTTCAC TGCATTCTAG  
901 TTGTGGTTTG TCCAAACTCA TCAATGTATC TTAAGGCGTA AATTGTAAGC GTTAATATTT  
961 TGTTAAAAAT CGCGTTAAAT TTTTGTTAAA TCAGCTCATT TTTTAAACAA TAGGCCGAAA  
1021 TCGGCAAAAT CCCTTATAAA TCAAAAAGAA AGACCGAGAT AGGGTTGAGT GTTGTTCAG  
1081 TTTGGAACAA GAGTCCACTA TTAAGAACG TGGACTCAA CGTCAAAGGG CGAAAAACCG  
1141 TCTATCAGGG CGATGGCCCA CTACGTGAAC CATCACCTA ATCAAGTTTT TTGGGGTCGA  
1201 GGTGCCGTAA AGCACTAAAT CGGAACCCTA AAGGGAGCCC CCGATTAGA GCTTGACGGG  
1261 GAAAGCCGGC GAACGTGGCG AGAAAGGAAG GGAAGAAAGC GAAAGGAGCG GGCCTAGGG  
1321 CGTGGAACG TGTAGCGTC ACGCTGCGC TAACCACCAC ACCCGCCGCG CTTAATGCGC  
1381 CGCTACAGGG CGCGTCAGGT GGCACTTTTT GGGGAAATGT GCGCGGAACC CCTATTTGTT  
1441 TATTTTTCTA AATACATTC AATATGTATC CGCTCATGAG ACAATAACCC TGATAAATGC  
1501 TTCAATAATA TTGAAAAAGG AAGAGTCTGT AGGCGGAAAG AACCAGCTGT GGAATGTGTG  
1561 TCAGTAGGG AGTGAAAGT CCCAGCAGC CCCAGCAGG AGAAGTATGC AAAGCATGCA  
1621 TCTCAATTAG TCAGCAACCA GGTGTGAAA GTCCCCAGGC TCCCCAGCAG GCAGAAGTAT  
1681 GCAAAGCATG CATCTCAAT AGTCAGCAAC CATAGTCCCG CCCCTAATC CGCCCATCCC  
1741 GCCCTAATC CGCCAGTT CCGCCATTC TCCGCCCAT GGCTGACTAA TTTTTTTTAT  
1801 TTATGCAGAG CCGAGGCCG CTTCCGCTC TGAGTATTC CAGAAGTAGT GAGGAGGCTT  
1861 TTTTGGAGGC GTAGCTTTT GCAAAGATC ATCAAGAGAC AGGATGAGGA TCGTTTCGCA  
1921 TGATTGAACA AGATGGATTG CACGCAGGTT CTCCGCCGCG TTGGGTGGAG AGGCTATTCC  
1981 GCTATGACTG GGCACAACAG ACAATCGGCT GCTCTGATGC CGCCGTGTT CCGCTGTCAG  
2041 CGCAGGGGCG CCCGGTTCTT TTTGTCAAGA CCGACCTGTC CGGTGCCCTG AATGAAGTGC  
2101 AAGACGAGG ACGCGGCTA TCGTGGCTGG CCACGACGGG CGTTCCTTGC GCAGCTGTC  
2161 TCGACGTTGT CACTGAAGCG GGAAGGGACT GGCTGCTATT GGGCGAAGTG CCGGGGCAGG  
2221 ATCTCCTGTC ATCTACCTT GCTCCTGCC AGAAAGTATC CATCATGGCT GATGCAATGC  
2281 GCGGCTGCA TACGTTGAT CCGGCTACCT GCCCATTCGA CCACCAAGCG AAACATCGCA  
2341 TCGAGCGAGC ACGTACTCG ATGGAAGCCG GTCTTGTGCA TCAGGATGAT CTGGACGAAG  
2401 AGCATCAGGG GCTCGCGCCA GCCGAAGTGT TCGCCAGGCT CAAGGCGAGC ATGCCCGAGC  
2461 GCGAGGATCT CGTCGTACC CATGGCGATG CTTGCTGCC GAATATCATG GTGAAAATG  
2521 GCCGTTTTT TGGATTCATC GACTGTGGCC GGCTGGGTGT GCGGACCCG TATCAGGACA  
2581 TACAGTTGGC TACCTGTGAT ATTGCTGAA AGCTTGGCGG CGAATGGGCT GACCGTTCC  
2641 TCGTGTCTTA CGGTATCGCC GCTCCGATT CGCAGCGCAT CGCCTTCTAT CGCCTTCTG  
2701 ACGAGTTCTT CTGAGCGGGA CTCTGGGGTT CGAAATGACC GACCAAGCGA CGCCCAACT  
2761 GCCATCACGA GATTTGATT CCACCGCCCG CTCTATGAA AGGTTGGGCT TCGGAATCGT  
2821 TTTCCGGGAC GCCGGCTGGA TGATCTCCA GCGCGGGGAT CTCATGCTGG AGTTCTTCG  
2881 CCACCTAGG GGGAGGCTAA CTGAAACACG GAAGGAGACA ATACCGGAAG GAACCCGCGC  
2941 TATGACGGCA ATAAAAAGAC AGAATAAAAC GCACGGTGTG GGGTCGTTTG TTCATAAACG  
3001 CGGGGTTCCG TCCCAGGGCT GGCACCTGT CGATACCCCA CCGAGACCCC ATTGGGGCCA  
3061 ATACGCCCGC GTTCTTCTT TTTCCCACC CCACCCCCA AGTTCGGGTG AAGGCCAGG  
3121 GCTCGCAGC AACGTCGGG CGGCAGGCC TGCCATAGCC TCAGGTTACT CATATATACT  
3181 TTAGATTGAT TAAAACTTC ATTTTAAATT TAAAAGGATC TAGGTGAAGA TCCTTTTTGA  
3241 TAATCTCATG ACCAAAATCC CTTAACGTGA GTTTTCGTT CACTGAGCGT CAGACCCCGT  
3301 AGAAAAAGATC AAAGGATCTT CTGAGATCC TTTTTTCTG CGCGTAATCT GCTGCTTGA  
3361 AACAAAAAAA CCACCGCTAC CAGCGTGGT TTGTTGCGG GATCAAGAGC TACCAACTCT  
3421 TTTTCCGAAG GTAAGTGGCT TCAGCAGAGC GCAGATACCA AATACTGTCC TTCTAGTGTA  
3481 GCCGTAGTTA GGCCACCACT TCAAGAAGT TGTAGACCCG CCTACATACC TCGCTCTGCT  
3541 AATCCTGTTA CCAGTGGCTG CTGCCAGTGG CGATAAGTCG TGTCTTACCG GGTGGACTC  
3601 AAGACGATAG TTACCGGATA AGGCGAGCG GTCGGGCTGA ACGGGGGGTG CGTGACACA  
3661 GCCCAGCTTG GAGCGAACGA CCTACACCGA ACTGAGATAC CTACAGCGTG AGTATGAGA  
3721 AAGCGCCACG CTTCCCGAAG GGAGAAAGGC GGACAGGTAT CCGGTAAGCG GCAGGGTCGG  
3781 AACAGGAGAG CGCACGAGGG AGCTTCCAGG GGGAAACGCC TGGTATCTTT ATAGTCTGT  
3841 CGGGTTTCG CACCTCTGAC TTGAGCGTCG ATTTTGTGA TGCTCGTCAG GGGGGCGGAG  
3901 CCTATGAAA AACGCCAGCA ACGCGCCTT TTTACGGTTC CTGGCCTTT GCTGGCCTT  
3961 TGCTCACATG TTCTTCTG CGTTATCCCC TGATTCTGTG GATAACCGTA TTACCGCAT  
4021 GCAT

//
